# Supplementary material for: Photoisomerization action spectroscopy: flicking the protonated merocyanine–spiropyran switch in the gas phase
Source: Royal Society of Chemistry journal article supplement (doi:10.1039/c5cp01567g), 2015-01-01
Supplement: c5cp01567g1.pdf [file c5cp01567g1.pdf]

## Supplementary Material for: Photoisomerization Action Spectroscopy: Flicking the Protonated Merocyanine-Spiropyran Switch in the Gas Phase

Peter B. Markworth, Brian D. Adamson, Neville J. A. Coughlan, Lars Goerigk\* and Evan J. Bieske\*

### Additional results of the quantum-chemical calculations

Table S1: DFT results for SPH<sup>+</sup> and MCH<sup>+</sup> isomers. Diagonal elements are isomer energies (kJ/-mol) with respect to that of the TTT form of MCH<sup>+</sup>. Blue off-diagonal elements are isomerization barriers for rotation around single bonds in MCH<sup>+</sup> or inversion of the five-membered ring in SPH<sup>+</sup>. Yellow cells are estimated barriers for isomerization around the central double bond in MCH<sup>+</sup>. Red cells show proton-exchange barriers between MCH<sup>+</sup> and SPH<sup>+</sup> (O and N protonation). All values are electronic energies (ZPE-uncorrected) obtained at DSD-PBEP86-D3(BJ)/def2-QZVP (upper row in each cell) and PW6B95-D3(BJ)/def2-TZVP (lower row) levels of theory.

|                    | TTT            | TTC            | CTT            | CTC            | CCT            | TCT            | TCC            | CCC              | SP(S) <sub>1</sub> | SP(S) <sub>2</sub> | SP(R) <sub>1</sub> | SP(R) <sub>2</sub> |
|--------------------|----------------|----------------|----------------|----------------|----------------|----------------|----------------|------------------|--------------------|--------------------|--------------------|--------------------|
| TTT                | 0.0<br>(0.0)   | 37.6<br>(43.5) | 30.2<br>(36.8) |                |                | -<br>(179.6)   |                |                  |                    |                    |                    |                    |
| TTC                | 37.3<br>(41.1) | 0.3<br>(2.4)   |                | 27.3<br>(32.8) |                |                | -<br>(188.9)   |                  |                    |                    |                    |                    |
| CTT                | 24.7<br>(30.0) |                | 5.6<br>(6.8)   | 34.4<br>(40.0) | -<br>(176.0)   |                |                |                  |                    |                    |                    |                    |
| CTC                |                | 19.6<br>(24.8) | 32.1<br>(36.4) | 8.0<br>(10.4)  |                |                |                | -<br>(187.4)     |                    |                    |                    |                    |
| CCT                |                |                | -<br>(160.9)   |                | 13.0<br>(21.9) |                |                | 20.1<br>(21.5)   |                    |                    |                    |                    |
| TCT                | -<br>(149.0)   |                |                |                |                | 21.3<br>(30.6) | 30.0<br>(29.4) |                  |                    |                    |                    |                    |
| TCC                |                | -<br>(152.3)   |                |                |                | 20.6<br>(21.0) | 30.7<br>(39.0) |                  |                    |                    |                    |                    |
| CCC                |                |                |                | -<br>(173.3)   | 15.1<br>(18.9) |                |                | 18.0<br>(24.5)   | 175.4<br>(189.9)   |                    |                    |                    |
| SP(S) <sub>1</sub> |                |                |                |                |                |                |                | 148.1<br>(149.0) | 45.3<br>(65.4)     | 16.2<br>(14.9)     |                    |                    |
| SP(S) <sub>2</sub> |                |                |                |                |                |                |                |                  | 26.0<br>(25.6)     | 35.5<br>(54.7)     |                    |                    |
| SP(R) <sub>1</sub> |                |                |                |                |                |                |                |                  |                    |                    | 42.4<br>(63.3)     | 13.8<br>(11.9)     |
| SP(R) <sub>2</sub> |                |                |                |                |                |                |                |                  |                    |                    | 12.8<br>(11.6)     | 43.4<br>(63.6)     |

Table S2: DFT results for SPH<sup>+</sup> and MCH<sup>+</sup> isomers. Diagonal elements are isomer energies (kJ/-mol) with respect to that of the TTT form of MCH<sup>+</sup>. Blue off-diagonal elements are isomerization barriers for rotation around single bonds in MCH<sup>+</sup> or inversion of the five-membered ring in SPH<sup>+</sup>. Yellow cells are estimated barriers for isomerization around the central double bond in MCH<sup>+</sup>. Red cells show proton-exchange barriers between MCH<sup>+</sup> and SPH<sup>+</sup> (O and N protonation). All values are Gibbs free energies at 298.15K obtained at the DSD-PBEP86-D3(BJ)/def2-QZVP (upper row in each cell) and PW6B95-D3(BJ)/def2-TZVP (lower row) levels of theory.

|                    | TTT            | TTC            | CTT            | CTC            | CCT            | TCT            | TCC            | CCC              | SP(S) <sub>1</sub> | SP(S) <sub>2</sub> | SP(R) <sub>1</sub> | SP(R) <sub>2</sub> |
|--------------------|----------------|----------------|----------------|----------------|----------------|----------------|----------------|------------------|--------------------|--------------------|--------------------|--------------------|
| TTT                | 0.0<br>(0.0)   | 33.9<br>(39.8) | 24.9<br>(31.4) |                |                | -<br>(170.4)   |                |                  |                    |                    |                    |                    |
| TTC                | 34.2<br>(38.0) | -0.3<br>(1.8)  |                | 23.3<br>(28.8) |                |                | -<br>(179.5)   |                  |                    |                    |                    |                    |
| CTT                | 21.6<br>(26.9) |                | 3.3<br>(4.5)   | 36.0<br>(41.5) | -<br>(169.1)   |                |                |                  |                    |                    |                    |                    |
| CTC                |                | 16.8<br>(21.9) | 32.9<br>(37.3) | 6.2<br>(8.7)   |                |                |                | -<br>(175.9)     |                    |                    |                    |                    |
| CCT                |                |                | -<br>(149.3)   |                | 15.4<br>(24.3) |                |                | 18.2<br>(19.6)   |                    |                    |                    |                    |
| TCT                | -<br>(140.4)   |                |                |                |                | 20.7<br>(30.0) | 30.8<br>(30.2) |                  |                    |                    |                    |                    |
| TCC                |                | -<br>(140.8)   |                |                |                | 19.3<br>(19.7) | 32.2<br>(40.5) |                  |                    |                    |                    |                    |
| CCC                |                |                |                | -<br>(159.1)   | 14.6<br>(18.4) |                |                | 19.0<br>(25.5)   | 168.7<br>(183.1)   |                    |                    |                    |
| SP(S) <sub>1</sub> |                |                |                |                |                |                |                | 134.9<br>(135.8) | 52.8<br>(72.8)     | 22.6<br>(21.4)     |                    |                    |
| SP(S) <sub>2</sub> |                |                |                |                |                |                |                |                  | 34.3<br>(33.9)     | 41.1<br>(60.3)     |                    |                    |
| SP(R) <sub>1</sub> |                |                |                |                |                |                |                |                  |                    |                    | 51.7<br>(72.5)     | 14.5<br>(12.7)     |
| SP(R) <sub>2</sub> |                |                |                |                |                |                |                |                  |                    |                    | 14.5<br>(13.2)     | 51.7<br>(72.0)     |

Table S3: Excitation energies  $\Delta E$  (nm) and oscillator strengths  $f_{osc}$  in length form for the first 10 transitions in the *trans* merocyanine isomers calculated at the TDA-B2GP-PLYP/def2-TZVP level of theory.

|    | TTT        |           | TTC        |           | CTT        |           | CTC        |           |
|----|------------|-----------|------------|-----------|------------|-----------|------------|-----------|
|    | $\Delta E$ | $f_{osc}$ |
| 1  | 394.4      | 1.07438   | 381.0      | 1.12257   | 389.8      | 1.06666   | 379.2      | 1.06913   |
| 2  | 336.6      | 0.01912   | 330.3      | 0.02043   | 335.1      | 0.01610   | 330.6      | 0.02443   |
| 3  | 302.9      | 0.00001   | 303.1      | 0.00233   | 303.4      | 0.00211   | 303.2      | 0.00280   |
| 4  | 327.0      | 0.05044   | 322.9      | 0.07372   | 324.0      | 0.06236   | 320.1      | 0.06101   |
| 5  | 269.2      | 0.00022   | 268.9      | 0.00026   | 269.0      | 0.00022   | 269.0      | 0.00034   |
| 6  | 284.5      | 0.06049   | 277.9      | 0.08202   | 285.5      | 0.05863   | 280.0      | 0.08332   |
| 7  | 244.1      | 0.30891   | 239.4      | 0.45599   | 240.6      | 0.33421   | 238.9      | 0.47702   |
| 8  | 239.4      | 0.03642   | 231.6      | 0.07651   | 238.2      | 0.03242   | 231.2      | 0.05157   |
| 9  | 232.9      | 0.10312   | 234.2      | 0.01539   | 231.4      | 0.07532   | 234.7      | 0.01029   |
| 10 | 210.2      | 0.09465   | 203.6      | 0.18292   | 207.9      | 0.10579   | 203.8      | 0.12781   |

Table S4: Excitation energies  $\Delta E$  (nm) and oscillator strengths  $f_{osc}$  in length form for the first 10 transitions in the *cis* merocyanine isomers calculated at the TDA-B2GP-PLYP/def2-TZVP level of theory.

|    | TCT        |           | TCC        |           | CCT        |           | CCC        |           |
|----|------------|-----------|------------|-----------|------------|-----------|------------|-----------|
|    | $\Delta E$ | $f_{osc}$ |
| 1  | 319.4      | 0.33773   | 325.5      | 0.33565   | 348.5      | 0.27145   | 344.6      | 0.53448   |
| 2  | 303.0      | 0.00614   | 304.3      | 0.00226   | 303.9      | 0.00032   | 303.6      | 0.00083   |
| 3  | 293.1      | 0.03013   | 297.8      | 0.10669   | 308.5      | 0.03437   | 310.7      | 0.06654   |
| 4  | 275.6      | 0.00667   | 270.6      | 0.00052   | 283.5      | 0.01347   | 270.4      | 0.00073   |
| 5  | 273.9      | 0.00852   | 277.0      | 0.02206   | 284.6      | 0.01420   | 296.5      | 0.02110   |
| 6  | 282.1      | 0.02659   | 276.5      | 0.05015   | 275.8      | 0.03432   | 276.1      | 0.05651   |
| 7  | 244.9      | 0.15739   | 234.2      | 0.14971   | 246.9      | 0.20259   | 232.5      | 0.35404   |
| 8  | 249.9      | 0.21916   | 251.3      | 0.10391   | 255.9      | 0.01817   | 245.2      | 0.02633   |
| 9  | 231.3      | 0.17144   | 226.6      | 0.15037   | 231.5      | 0.04973   | 228.6      | 0.05479   |
| 10 | 224.7      | 0.08858   | 216.2      | 0.59248   | 225.7      | 0.14707   | 208.4      | 0.22456   |

Table S5: Excitation energies  $\Delta E$  (nm) and oscillator strengths  $f_{osc}$  in length form for the first 10 transitions in the spiropropan isomers calculated at the TDA-B2GP-PLYP/def2-TZVP level of theory.

|    | SP(S) <sub>1</sub> |           | SP(S) <sub>2</sub> |           | SP(R) <sub>1</sub> |           | SP(R) <sub>2</sub> |           |
|----|--------------------|-----------|--------------------|-----------|--------------------|-----------|--------------------|-----------|
|    | $\Delta E$         | $f_{osc}$ |
| 1  | 305.0              | 0.00007   | 305.8              | 0.00004   | 304.8              | 0.00059   | 305.3              | 0.00019   |
| 2  | 271.5              | 0.00026   | 271.3              | 0.00023   | 271.2              | 0.00457   | 272.0              | 0.00027   |
| 3  | 266.4              | 0.12639   | 260.9              | 0.13489   | 267.3              | 0.11049   | 262.8              | 0.10712   |
| 4  | 254.9              | 0.03062   | 255.2              | 0.02943   | 259.7              | 0.01282   | 250.6              | 0.04966   |
| 5  | 230.3              | 0.02226   | 230.9              | 0.00964   | 230.4              | 0.01037   | 230.6              | 0.02140   |
| 6  | 222.6              | 1.08876   | 220.9              | 1.23163   | 223.1              | 1.09227   | 220.2              | 1.21177   |
| 7  | 194.7              | 0.00276   | 196.8              | 0.00430   | 195.4              | 0.00509   | 195.9              | 0.00222   |
| 8  | 215.6              | 0.35006   | 211.7              | 0.34707   | 211.2              | 0.36902   | 212.2              | 0.35471   |
| 9  | 220.6              | 0.00209   | 214.6              | 0.00420   | 208.6              | 0.01023   | 213.3              | 0.01073   |
| 10 | 199.9              | 0.00925   | 204.6              | 0.01291   | 214.4              | 0.00709   | 201.4              | 0.00132   |

## Images of all optimised structures

merocyanine TTT

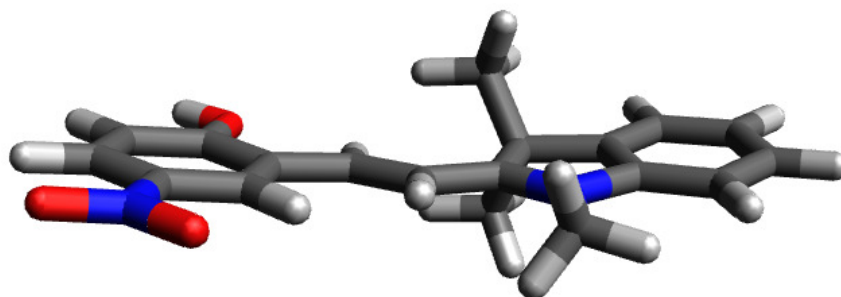

merocyanine TTC

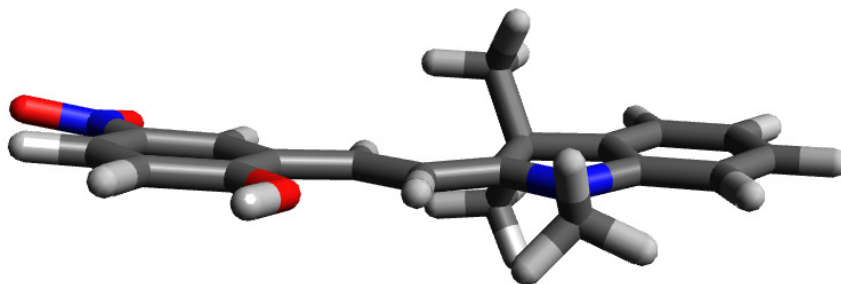

merocyanine CTT

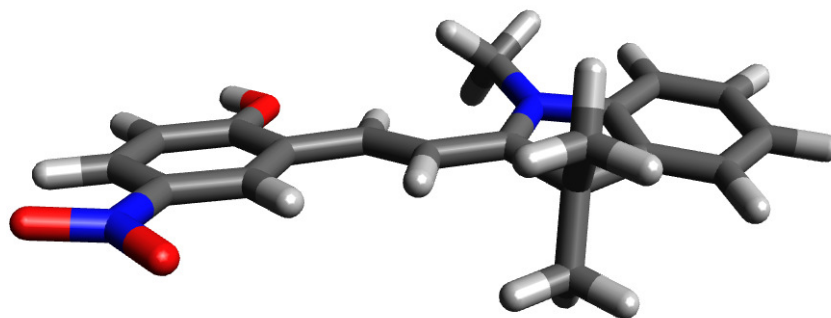

merocyanine CTC

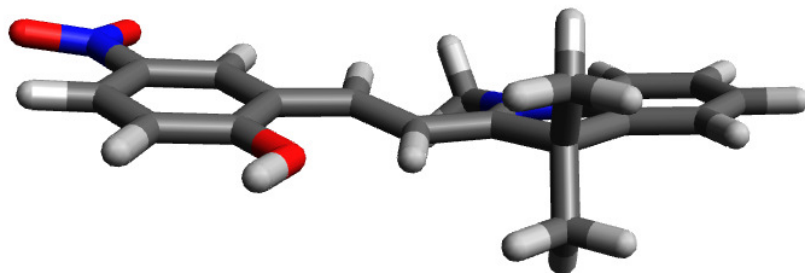

merocyanine CCT

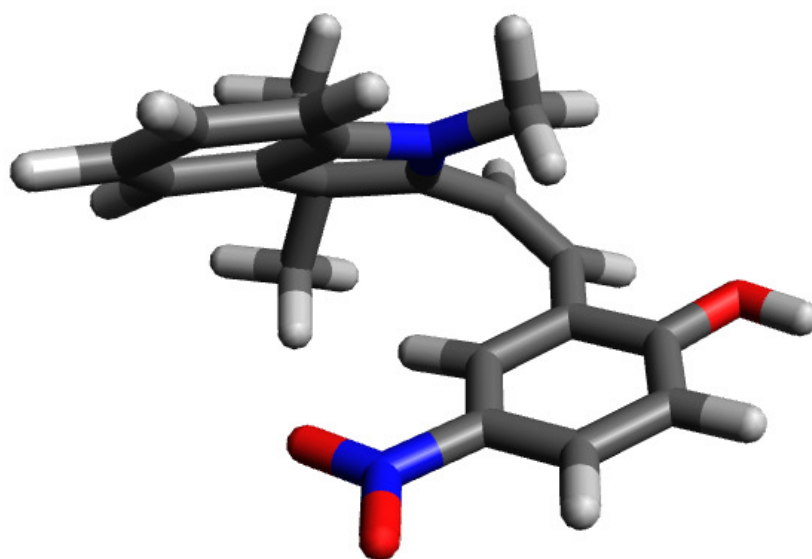



merocyanine CCC

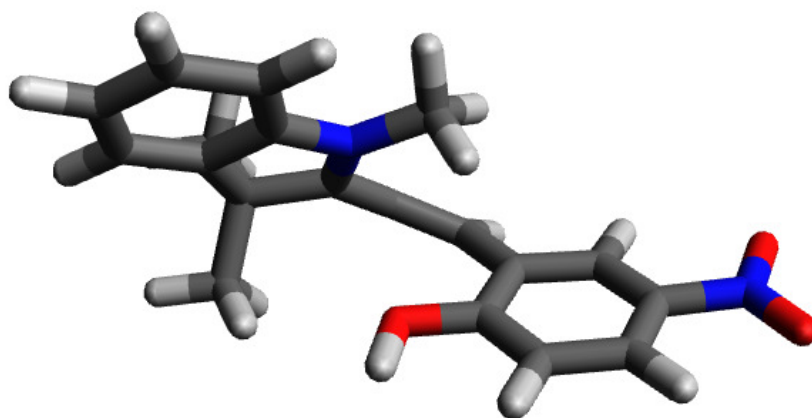

spiropyran SP(S)<sub>1</sub>

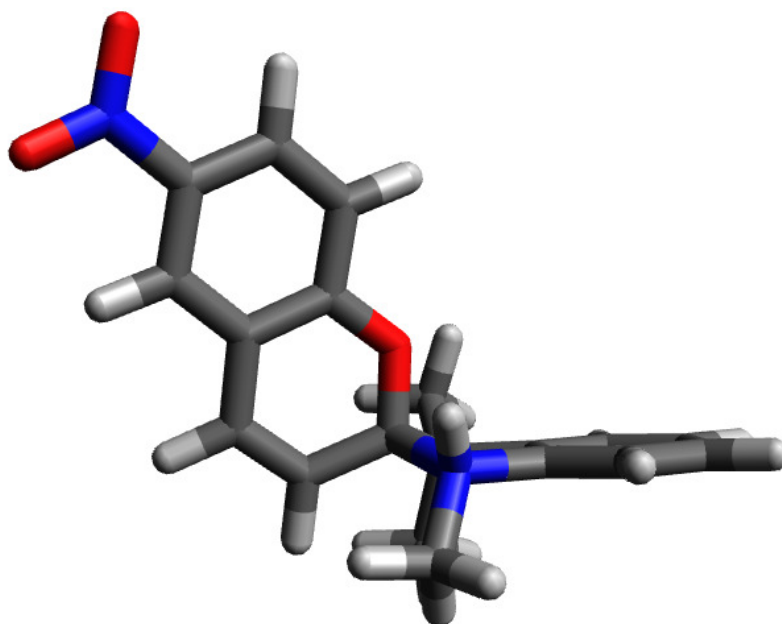

spiropyran SP(S)<sub>2</sub>

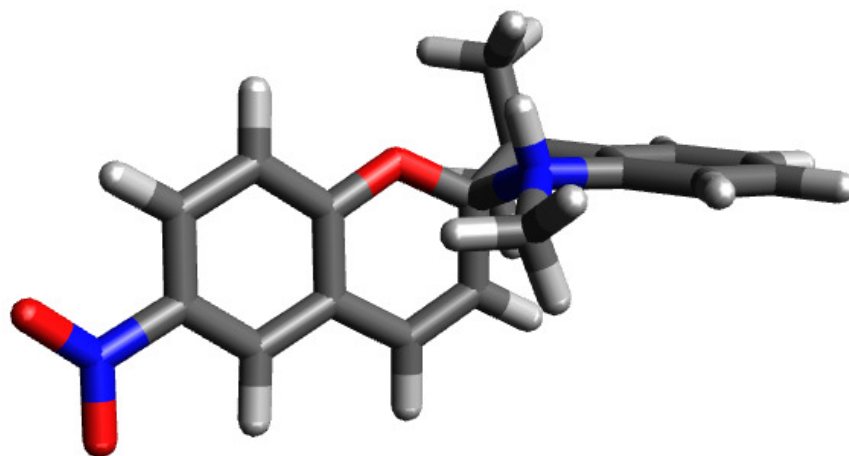

spiropyran SP(R)<sub>1</sub>

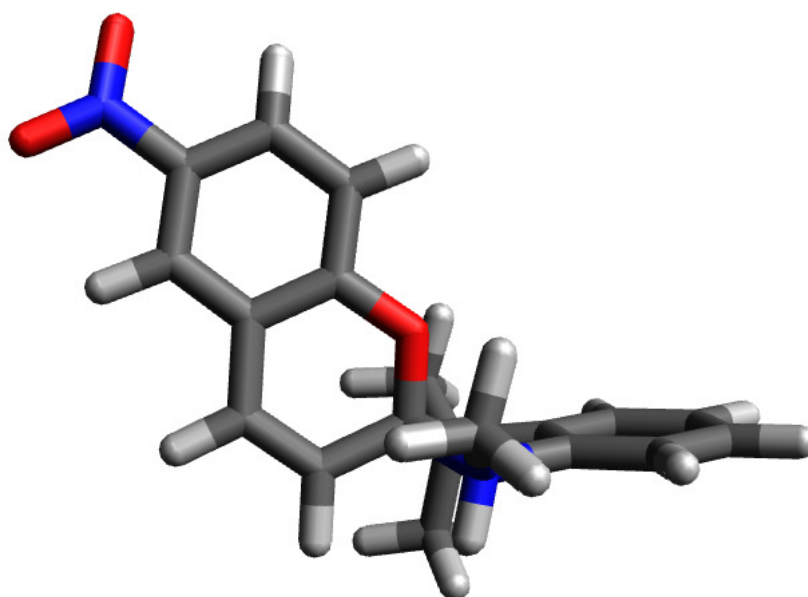



spiropyran SP(R)<sub>2</sub>

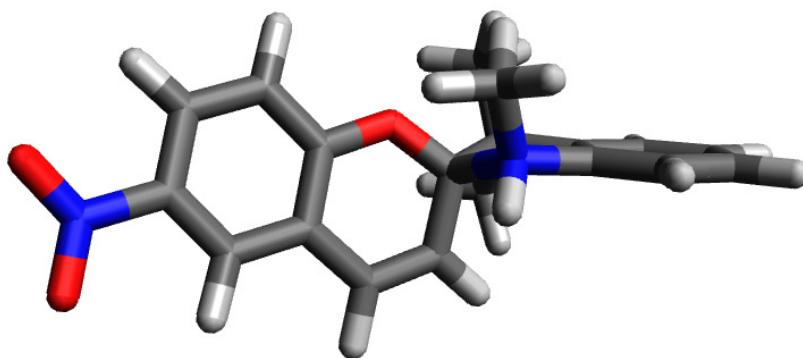

TS for rotation from TTT to TTC

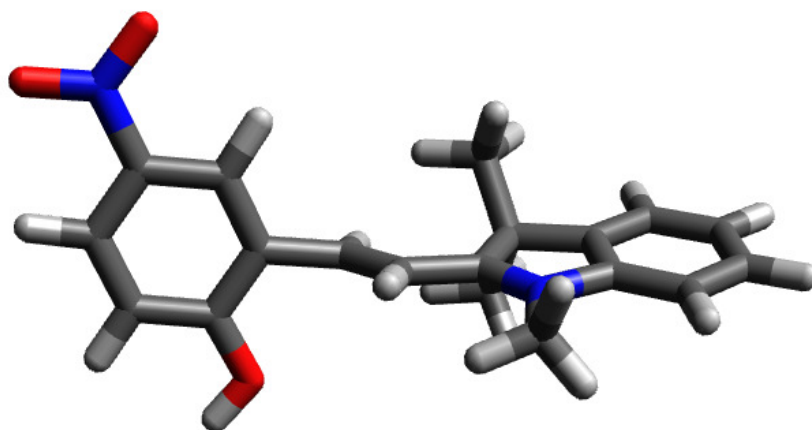

TS for rotation from TTT to CTT

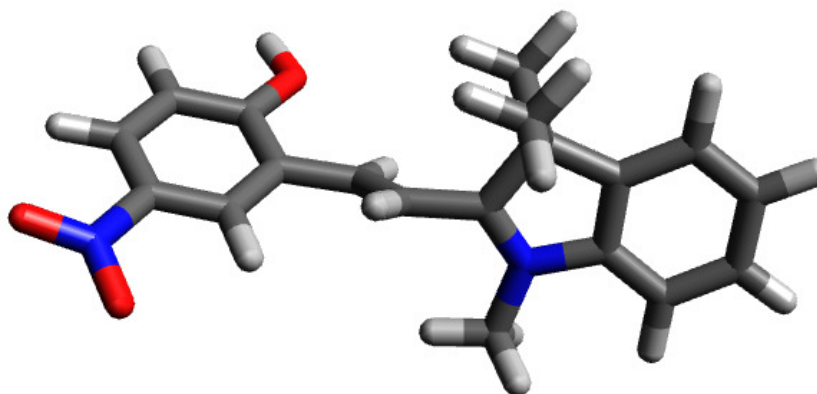

**TS for rotation from TTC to CTC**

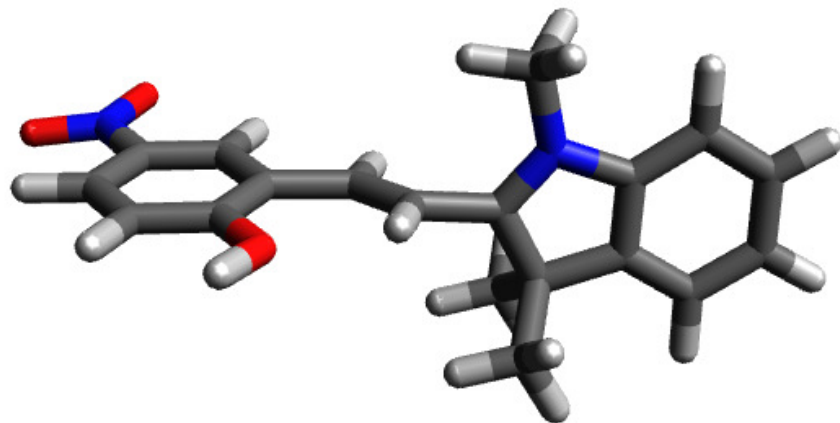

**TS for rotation from CTT to CTC**

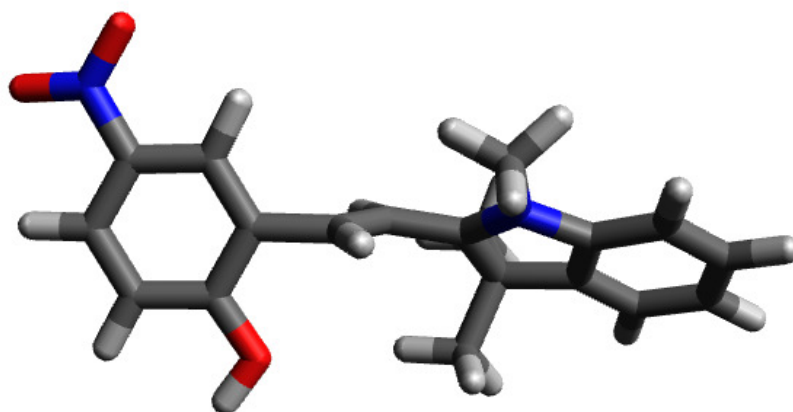

TS for rotation from CCT to CCC

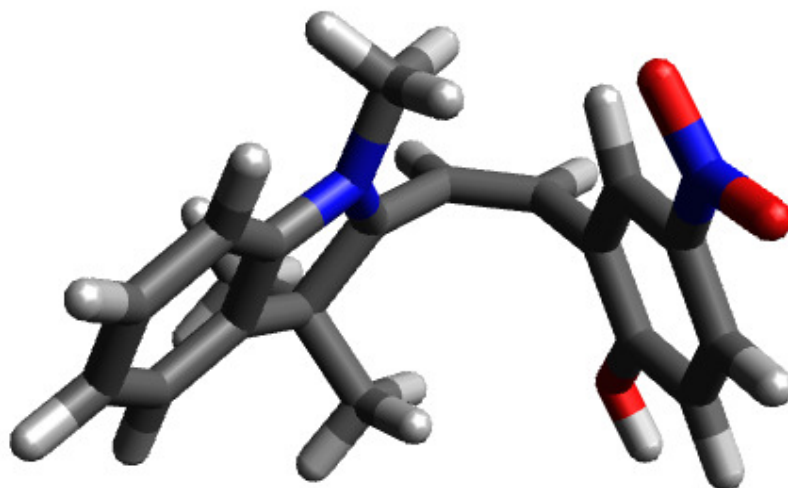

TS for rotation from TCC to TCT

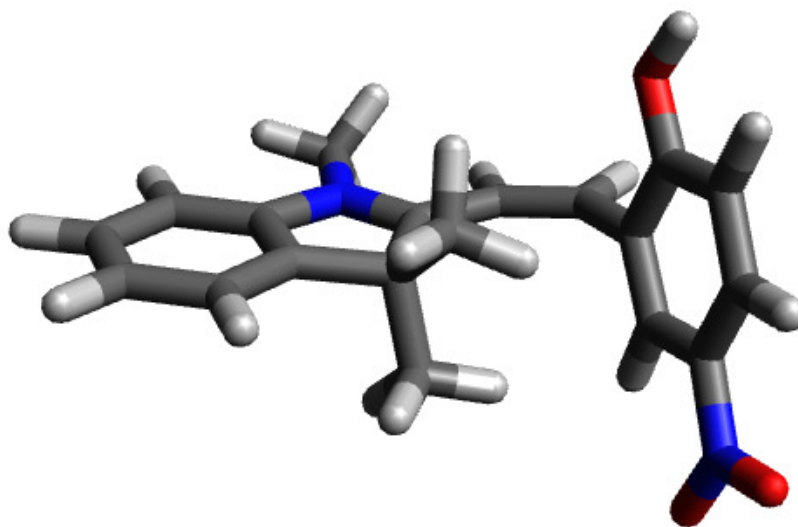

TS for rotation from TTT to TCT

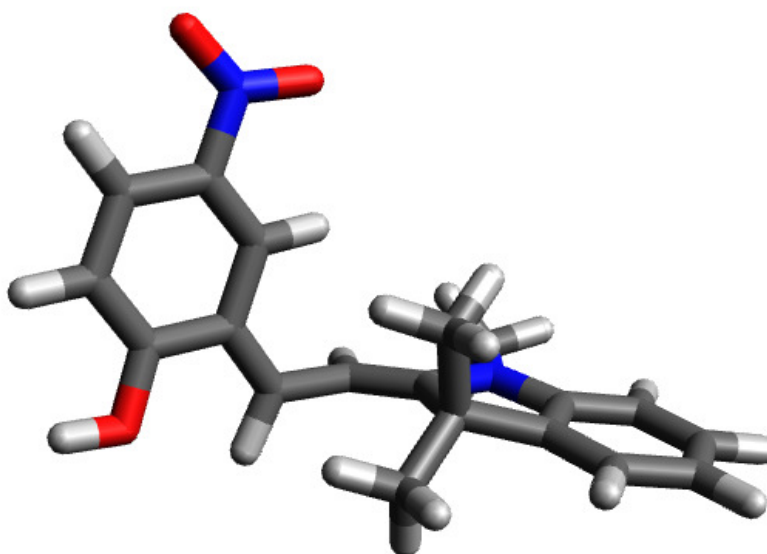

TS for rotation from TTC to TCC

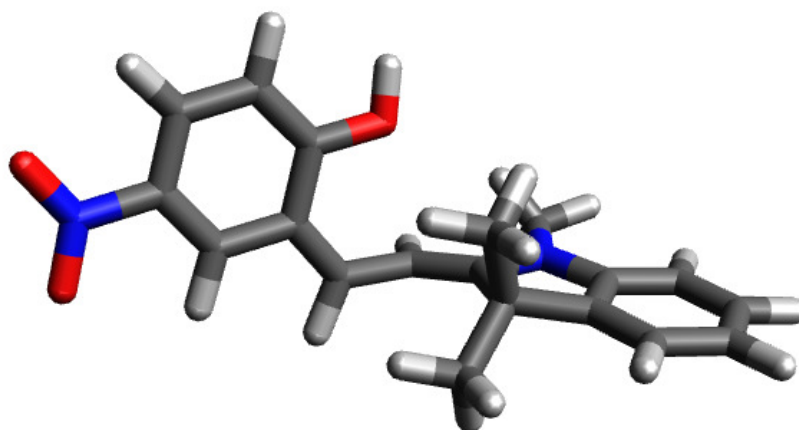

TS for rotation from CCT to CTT

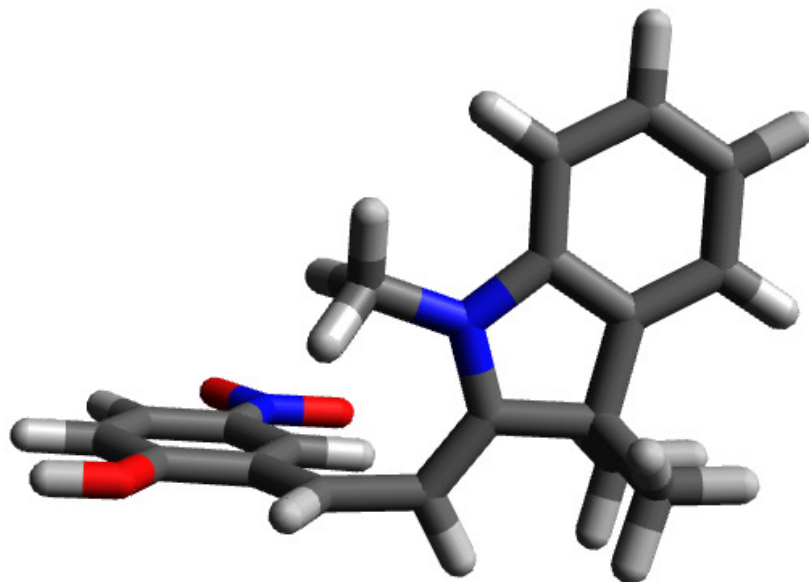

TS for rotation from CTC to CCC

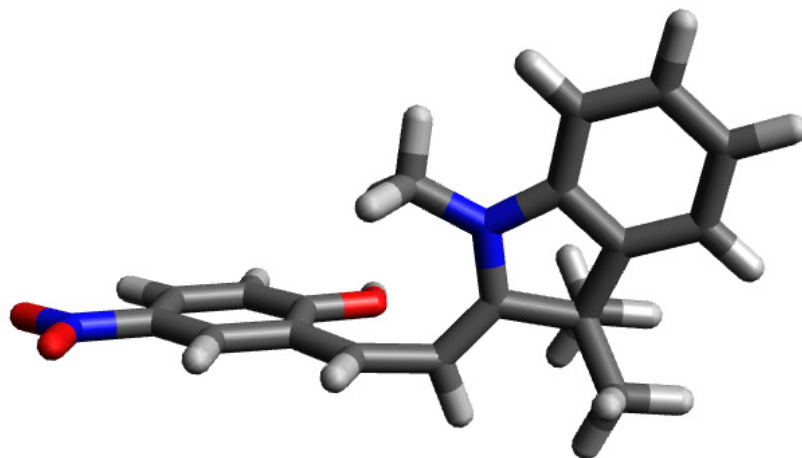

TS for inversion between SP(S)<sub>1</sub> and SP(S)<sub>2</sub>

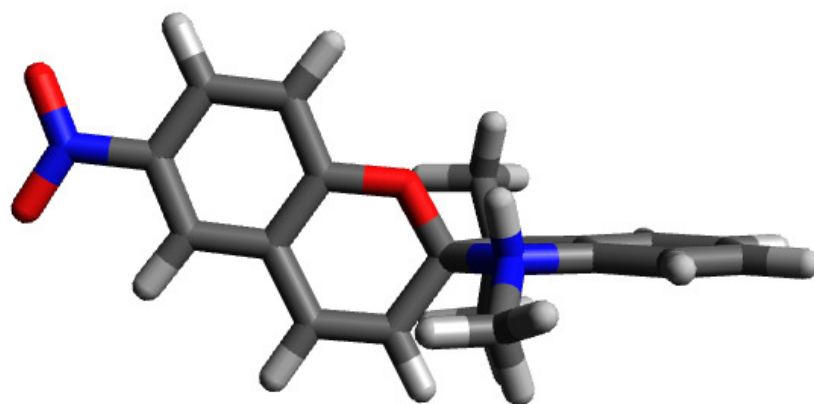

TS for inversion between SP(R)<sub>1</sub> and SP(R)<sub>2</sub>

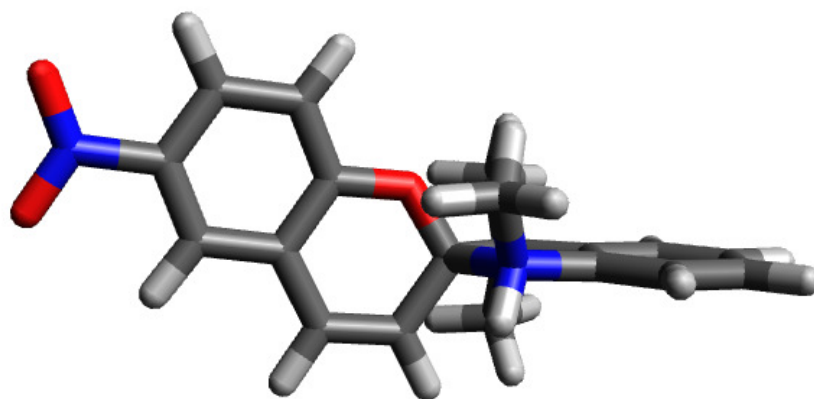

TS between SP(S) and merocyanine CCC

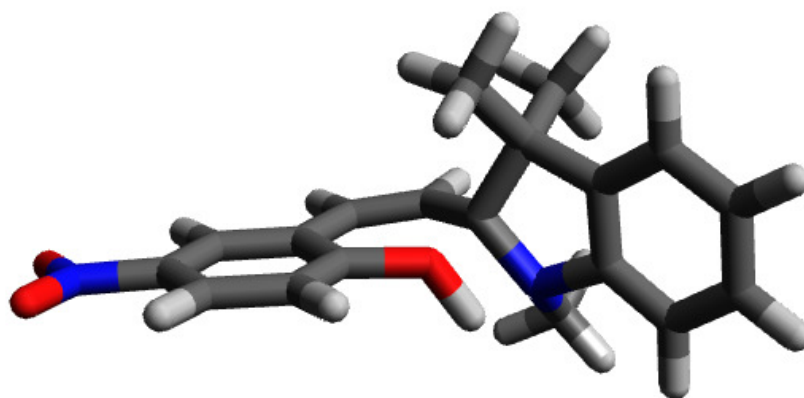

## Cartesian coordinates of all optimised structures in Å

### merocyanine (TTT)

|   |           |           |           |
|---|-----------|-----------|-----------|
| C | -2.763838 | -1.065217 | 0.999564  |
| C | -2.939364 | -0.691320 | -0.321344 |
| C | -4.051958 | -1.131866 | -1.003844 |
| C | -4.964232 | -1.938140 | -0.336011 |
| C | -4.776758 | -2.283617 | 0.993962  |
| C | -3.661916 | -1.849960 | 1.691412  |
| C | -0.926499 | 0.152909  | 0.498872  |
| C | 0.368758  | 0.679278  | 0.706624  |
| C | 1.061126  | 1.422884  | -0.186750 |
| C | 2.413407  | 1.875590  | -0.025780 |
| C | 3.144935  | 1.674734  | 1.145637  |
| C | 3.055117  | 2.518059  | -1.104990 |
| C | 4.444274  | 2.092393  | 1.226600  |
| C | 4.373258  | 2.943612  | -0.994016 |
| C | 5.073232  | 2.732550  | 0.169964  |
| N | -1.542892 | -0.522237 | 1.450242  |
| N | 5.191957  | 1.847236  | 2.463102  |
| O | 6.337598  | 2.227621  | 2.499849  |
| O | 4.609441  | 1.274463  | 3.356618  |
| C | -1.788188 | 0.183650  | -0.746472 |
| C | -1.072577 | -0.370802 | -1.980765 |
| C | -2.283409 | 1.617099  | -1.011866 |
| C | -1.038575 | -0.724749 | 2.797654  |
| O | 2.350924  | 2.677703  | -2.233218 |
| H | 2.867362  | 3.141326  | -2.897740 |
| H | -4.218282 | -0.869959 | -2.036819 |
| H | -5.832414 | -2.304286 | -0.858742 |
| H | -5.501487 | -2.904258 | 1.494280  |
| H | -3.520535 | -2.134667 | 2.720463  |
| H | 0.840880  | 0.407613  | 1.636922  |
| H | 0.596481  | 1.705431  | -1.116220 |
| H | 2.716503  | 1.192968  | 2.007383  |
| H | 4.848508  | 3.434029  | -1.829849 |
| H | 6.095886  | 3.051649  | 0.279750  |
| H | -0.677883 | -1.366988 | -1.804940 |
| H | -1.784364 | -0.421390 | -2.798668 |
| H | -0.257732 | 0.271370  | -2.293049 |
| H | -2.739495 | 2.048544  | -0.125756 |
| H | -3.033566 | 1.589586  | -1.796113 |
| H | -1.472195 | 2.257594  | -1.340881 |
| H | -1.821180 | -1.154550 | 3.404732  |
| H | -0.191266 | -1.404094 | 2.788520  |
| H | -0.741040 | 0.224211  | 3.228681  |

### merocyanine (TTC)

|   |           |           |           |
|---|-----------|-----------|-----------|
| C | -2.942701 | 0.320170  | -0.285590 |
| C | -3.010387 | 1.667387  | -0.582580 |
| C | -4.234292 | 2.264247  | -0.780562 |
| C | -5.373320 | 1.477104  | -0.694859 |
| C | -5.284192 | 0.120262  | -0.418202 |
| C | -4.057265 | -0.488266 | -0.205403 |
| C | -0.788836 | 1.017305  | -0.292772 |
| C | 0.620732  | 0.879798  | -0.239210 |
| C | 1.486704  | 1.910377  | -0.402904 |
| C | 2.921470  | 1.895523  | -0.470401 |
| C | 3.563083  | 3.122966  | -0.681668 |
| C | 3.733668  | 0.744121  | -0.385836 |
| C | 4.924411  | 3.187808  | -0.820341 |
| C | 5.112581  | 0.838646  | -0.512279 |
| C | 5.715047  | 2.054758  | -0.736517 |
| N | -1.584645 | -0.018061 | -0.099115 |
| N | 5.561392  | 4.481227  | -1.089137 |
| O | 6.738218  | 4.464233  | -1.365417 |
| O | 4.865265  | 5.468130  | -1.025045 |
| C | -1.623488 | 2.240862  | -0.613910 |
| C | -1.319661 | 2.784805  | -2.016222 |
| C | -1.491649 | 3.311979  | 0.477448  |
| C | -1.160109 | -1.357309 | 0.268302  |
| O | 3.141574  | -0.444183 | -0.191600 |
| H | 3.803580  | -1.140239 | -0.148947 |
| H | -4.312781 | 3.316325  | -1.007426 |
| H | -6.340737 | 1.925438  | -0.850732 |
| H | -6.182238 | -0.472256 | -0.363415 |
| H | -3.997589 | -1.541244 | 0.014086  |
| H | 1.007661  | -0.111797 | -0.096468 |
| H | 1.073208  | 2.900832  | -0.519985 |
| H | 2.988949  | 4.032499  | -0.754150 |
| H | 5.713977  | -0.055667 | -0.441913 |
| H | 6.781850  | 2.143489  | -0.854745 |
| H | -1.446420 | 2.009562  | -2.766167 |
| H | -2.018534 | 3.584736  | -2.240262 |
| H | -0.313986 | 3.183093  | -2.095555 |
| H | -1.750257 | 2.902878  | 1.449507  |
| H | -2.182863 | 4.119664  | 0.257803  |
| H | -0.492685 | 3.729955  | 0.530587  |
| H | -1.998611 | -1.874837 | 0.713349  |
| H | -0.818040 | -1.900927 | -0.607037 |
| H | -0.364083 | -1.306391 | 1.000290  |

**merocyanine (CTT)**

|   |           |           |           |
|---|-----------|-----------|-----------|
| C | -3.035150 | 1.022841  | 0.763566  |
| C | -3.164450 | -0.341358 | 0.939284  |
| C | -4.409008 | -0.888563 | 1.152722  |
| C | -5.504814 | -0.038509 | 1.190632  |
| C | -5.353362 | 1.330284  | 1.024445  |
| C | -4.104533 | 1.892127  | 0.807207  |
| C | -0.928508 | 0.227995  | 0.604357  |
| C | 0.475810  | 0.094582  | 0.464420  |
| C | 1.419183  | 1.063691  | 0.532619  |
| C | 2.837564  | 0.884097  | 0.383561  |
| C | 3.442546  | -0.353081 | 0.146097  |
| C | 3.667547  | 2.021727  | 0.459362  |
| C | 4.799408  | -0.431726 | -0.020805 |
| C | 5.043569  | 1.913739  | 0.301636  |
| C | 5.614163  | 0.688041  | 0.056112  |
| N | -1.667162 | 1.317295  | 0.536333  |
| N | 5.413512  | -1.732571 | -0.309823 |
| O | 6.586250  | -1.730974 | -0.602283 |
| O | 4.704944  | -2.711080 | -0.244236 |
| C | -1.814885 | -0.976180 | 0.819560  |
| C | -1.425362 | -1.748068 | 2.079985  |
| C | -1.744707 | -1.873317 | -0.426309 |
| C | -1.230111 | 2.654628  | 0.194927  |
| O | 3.072839  | 3.204627  | 0.673317  |
| H | 3.725243  | 3.908350  | 0.722657  |
| H | -4.537103 | -1.951168 | 1.289630  |
| H | -6.487379 | -0.448590 | 1.356672  |
| H | -6.218627 | 1.970606  | 1.066676  |
| H | -3.994755 | 2.956815  | 0.685383  |
| H | 0.790664  | -0.929389 | 0.331602  |
| H | 1.127372  | 2.076593  | 0.749488  |
| H | 2.868980  | -1.261655 | 0.080548  |
| H | 5.662115  | 2.796252  | 0.365257  |
| H | 6.676068  | 0.577174  | -0.085009 |
| H | -1.496900 | -1.118777 | 2.961712  |
| H | -2.103673 | -2.586526 | 2.205361  |
| H | -0.415567 | -2.141890 | 2.006392  |
| H | -2.012884 | -1.322138 | -1.322709 |
| H | -2.446948 | -2.692468 | -0.306752 |
| H | -0.752627 | -2.297171 | -0.551679 |
| H | -2.068028 | 3.191417  | -0.228876 |
| H | -0.871770 | 3.180597  | 1.075027  |
| H | -0.441466 | 2.599720  | -0.546067 |

**merocyanine (CTC)**

|   |           |           |           |
|---|-----------|-----------|-----------|
| C | -3.283942 | 0.285137  | 0.332531  |
| C | -3.402288 | -1.091448 | 0.297129  |
| C | -4.646938 | -1.668818 | 0.198185  |
| C | -5.754718 | -0.835906 | 0.133775  |
| C | -5.614997 | 0.544469  | 0.164683  |
| C | -4.366013 | 1.137352  | 0.266282  |
| C | -1.157668 | -0.470558 | 0.385668  |
| C | 0.257539  | -0.585116 | 0.376368  |
| C | 1.155212  | 0.385275  | 0.076953  |
| C | 2.587541  | 0.302885  | -0.018676 |
| C | 3.271932  | 1.502241  | -0.245252 |
| C | 3.354977  | -0.877093 | 0.081582  |
| C | 4.636990  | 1.522948  | -0.355699 |
| C | 4.738781  | -0.829081 | -0.025576 |
| C | 5.387277  | 0.365165  | -0.243961 |
| N | -1.906485 | 0.611657  | 0.424263  |
| N | 5.316279  | 2.796364  | -0.614992 |
| O | 6.498117  | 2.747278  | -0.862780 |
| O | 4.645897  | 3.802912  | -0.568914 |
| C | -2.037422 | -1.698892 | 0.377032  |
| C | -1.845529 | -2.447424 | 1.707009  |
| C | -1.741682 | -2.608628 | -0.813316 |
| C | -1.468238 | 1.978649  | 0.606475  |
| O | 2.714330  | -2.041918 | 0.265328  |
| H | 3.346294  | -2.765608 | 0.305401  |
| H | -4.766421 | -2.740547 | 0.166147  |
| H | -6.738374 | -1.267909 | 0.049780  |
| H | -6.490597 | 1.168965  | 0.101622  |
| H | -4.264572 | 2.209904  | 0.272119  |
| H | 0.610393  | -1.584854 | 0.557529  |
| H | 0.790640  | 1.373001  | -0.157632 |
| H | 2.729853  | 2.429238  | -0.339025 |
| H | 5.309058  | -1.742184 | 0.060730  |
| H | 6.459021  | 0.416800  | -0.337924 |
| H | -2.064025 | -1.803650 | 2.553829  |
| H | -2.529175 | -3.290228 | 1.735271  |
| H | -0.832677 | -2.827881 | 1.801914  |
| H | -1.911122 | -2.088894 | -1.751509 |
| H | -2.404595 | -3.467598 | -0.776770 |
| H | -0.717481 | -2.970894 | -0.788416 |
| H | -2.274496 | 2.538232  | 1.061314  |
| H | -0.613814 | 1.999383  | 1.271391  |
| H | -1.210863 | 2.433278  | -0.345871 |



**merocyanine (CCT)**

|   |           |           |           |
|---|-----------|-----------|-----------|
| C | 1.651934  | -2.335491 | 2.498027  |
| C | 0.876853  | -3.302254 | 1.882706  |
| C | 1.069738  | -4.626413 | 2.203703  |
| C | 2.050428  | -4.939223 | 3.138125  |
| C | 2.802974  | -3.948965 | 3.753030  |
| C | 2.615410  | -2.612016 | 3.441932  |
| C | 0.486599  | -1.222682 | 0.936091  |
| C | 0.163886  | -0.170769 | 0.003024  |
| C | 1.108236  | 0.510143  | -0.662798 |
| C | 2.533271  | 0.196608  | -0.634633 |
| C | 2.985767  | -1.113091 | -0.622443 |
| C | 3.488734  | 1.221755  | -0.642227 |
| C | 4.331503  | -1.386868 | -0.576433 |
| C | 4.848061  | 0.930540  | -0.617161 |
| C | 5.277234  | -0.377417 | -0.578604 |
| N | 1.331393  | -1.082686 | 1.920541  |
| N | 4.752904  | -2.785715 | -0.522372 |
| O | 5.938718  | -3.012033 | -0.520586 |
| O | 3.876863  | -3.624774 | -0.468203 |
| C | -0.057989 | -2.626131 | 0.920943  |
| C | -0.129653 | -3.260100 | -0.462329 |
| C | -1.475237 | -2.529490 | 1.539387  |
| C | 1.923641  | 0.151292  | 2.393185  |
| O | 3.013519  | 2.472423  | -0.634339 |
| H | 3.724028  | 3.117136  | -0.693231 |
| H | 0.498900  | -5.406594 | 1.725419  |
| H | 2.242743  | -5.970370 | 3.386764  |
| H | 3.558141  | -4.223283 | 4.470240  |
| H | 3.213866  | -1.842745 | 3.900796  |
| H | -0.879804 | 0.008330  | -0.211169 |
| H | 0.801554  | 1.325501  | -1.302025 |
| H | 2.297323  | -1.936866 | -0.681095 |
| H | 5.567139  | 1.736155  | -0.620744 |
| H | 6.324209  | -0.628062 | -0.556450 |
| H | 0.855962  | -3.469678 | -0.865081 |
| H | -0.666125 | -4.201534 | -0.399492 |
| H | -0.668773 | -2.616090 | -1.151430 |
| H | -1.459874 | -2.020322 | 2.498588  |
| H | -1.852829 | -3.535308 | 1.691034  |
| H | -2.149154 | -2.003585 | 0.869415  |
| H | 1.800358  | 0.192364  | 3.470520  |
| H | 2.981301  | 0.171052  | 2.143347  |
| H | 1.425244  | 0.991254  | 1.930028  |

**merocyanine (TCT)**

|   |           |           |           |
|---|-----------|-----------|-----------|
| C | -2.966373 | 0.155181  | 0.006378  |
| C | -2.337027 | 0.958507  | 0.939998  |
| C | -2.634562 | 0.794413  | 2.275381  |
| C | -3.568992 | -0.172115 | 2.628024  |
| C | -4.195534 | -0.954857 | 1.668309  |
| C | -3.900016 | -0.806880 | 0.323135  |
| C | -1.568589 | 1.439468  | -1.203430 |
| C | -0.996729 | 2.098917  | -2.371032 |
| C | 0.288641  | 2.088606  | -2.730978 |
| C | 1.299779  | 1.218491  | -2.153065 |
| C | 0.999431  | -0.089522 | -1.810262 |
| C | 2.607801  | 1.680953  | -1.945749 |
| C | 1.947219  | -0.877069 | -1.200763 |
| C | 3.553852  | 0.866485  | -1.339720 |
| C | 3.220432  | -0.409708 | -0.941534 |
| N | -2.469250 | 0.504210  | -1.274683 |
| N | 1.590802  | -2.240659 | -0.827627 |
| O | 2.324974  | -2.811110 | -0.057290 |
| O | 0.578764  | -2.702616 | -1.312885 |
| C | -1.410965 | 1.900837  | 0.225115  |
| C | -1.932446 | 3.352963  | 0.274053  |
| C | 0.024283  | 1.880800  | 0.744199  |
| C | -2.921255 | -0.147482 | -2.489676 |
| O | 2.865395  | 2.941720  | -2.322923 |
| H | 3.790999  | 3.161454  | -2.188876 |
| H | -2.158477 | 1.396457  | 3.033374  |
| H | -3.819039 | -0.320695 | 3.666234  |
| H | -4.918189 | -1.693231 | 1.972831  |
| H | -4.380106 | -1.417416 | -0.423458 |
| H | -1.701466 | 2.685318  | -2.947244 |
| H | 0.599294  | 2.745167  | -3.530179 |
| H | 0.040183  | -0.518433 | -2.043682 |
| H | 4.550802  | 1.240591  | -1.163869 |
| H | 3.933974  | -1.051029 | -0.452922 |
| H | -2.960002 | 3.428472  | -0.070144 |
| H | -1.884437 | 3.699583  | 1.301413  |
| H | -1.305003 | 3.993477  | -0.338147 |
| H | 0.438336  | 0.879133  | 0.749487  |
| H | 0.030032  | 2.269318  | 1.758730  |
| H | 0.652906  | 2.525329  | 0.139249  |
| H | -2.888708 | -1.222017 | -2.343694 |
| H | -3.940663 | 0.156759  | -2.706892 |
| H | -2.267076 | 0.132230  | -3.305186 |

## merocyanine (TCC)

|   |           |           |           |
|---|-----------|-----------|-----------|
| C | 2.510462  | 1.558069  | 0.868959  |
| C | 2.249791  | 1.869073  | -0.452114 |
| C | 3.285456  | 1.893556  | -1.359062 |
| C | 4.565920  | 1.612646  | -0.901579 |
| C | 4.804712  | 1.314840  | 0.432198  |
| C | 3.769592  | 1.280396  | 1.353403  |
| C | 0.290655  | 1.906339  | 0.794765  |
| C | -1.038275 | 2.209242  | 1.291513  |
| C | -2.212678 | 1.661485  | 0.970156  |
| C | -2.526384 | 0.465375  | 0.201124  |
| C | -3.705796 | 0.450091  | -0.537906 |
| C | -1.756855 | -0.704323 | 0.236520  |
| C | -4.068415 | -0.673527 | -1.240454 |
| C | -2.162400 | -1.841798 | -0.444589 |
| C | -3.320193 | -1.832400 | -1.191471 |
| N | 1.281970  | 1.601182  | 1.576388  |
| N | -5.289575 | -0.648621 | -2.052306 |
| O | -5.634623 | -1.691994 | -2.555382 |
| O | -5.853717 | 0.415151  | -2.170954 |
| C | 0.788016  | 2.164651  | -0.602472 |
| C | 0.562320  | 3.662597  | -0.883193 |
| C | 0.109395  | 1.313239  | -1.673829 |
| C | 1.181595  | 1.296200  | 2.989332  |
| O | -0.615837 | -0.699112 | 0.966568  |
| H | -0.248444 | -1.586681 | 0.993663  |
| H | 3.115682  | 2.136541  | -2.396387 |
| H | 5.391783  | 1.631365  | -1.593587 |
| H | 5.809294  | 1.107449  | 0.761835  |
| H | 3.956595  | 1.050644  | 2.389553  |
| H | -1.054430 | 3.044772  | 1.981027  |
| H | -3.082375 | 2.162726  | 1.372505  |
| H | -4.341221 | 1.319724  | -0.578497 |
| H | -1.566040 | -2.740077 | -0.384206 |
| H | -3.651636 | -2.701138 | -1.734109 |
| H | 1.059178  | 4.281723  | -0.141447 |
| H | 0.974823  | 3.903520  | -1.857962 |
| H | -0.499333 | 3.892006  | -0.883508 |
| H | 0.233530  | 0.254263  | -1.476267 |
| H | 0.569221  | 1.539364  | -2.631052 |
| H | -0.948081 | 1.544373  | -1.744187 |
| H | 1.822939  | 0.449514  | 3.205349  |
| H | 1.509903  | 2.147614  | 3.577217  |
| H | 0.155476  | 1.043944  | 3.223446  |

## merocyanine (CCC)

|   |           |           |           |
|---|-----------|-----------|-----------|
| C | -2.579711 | -0.782556 | 0.786434  |
| C | -3.672707 | -0.565415 | -0.032270 |
| C | -4.835500 | -1.266889 | 0.198329  |
| C | -4.863082 | -2.166265 | 1.256955  |
| C | -3.750118 | -2.371287 | 2.059224  |
| C | -2.572373 | -1.677244 | 1.834804  |
| C | -1.890165 | 0.788271  | -0.666559 |
| C | -1.096032 | 1.779671  | -1.321547 |
| C | 0.213470  | 1.786764  | -1.632342 |
| C | 1.224923  | 0.747790  | -1.613435 |
| C | 2.554138  | 1.139164  | -1.452540 |
| C | 0.970626  | -0.612576 | -1.843875 |
| C | 3.559458  | 0.206463  | -1.467158 |
| C | 2.008657  | -1.531648 | -1.910294 |
| C | 3.309567  | -1.130010 | -1.713169 |
| N | -1.533656 | 0.074876  | 0.367884  |
| N | 4.935135  | 0.640629  | -1.206845 |
| O | 5.800187  | -0.198279 | -1.283924 |
| O | 5.098354  | 1.802408  | -0.914653 |
| C | -3.321395 | 0.493583  | -1.037112 |
| C | -3.404541 | 0.007383  | -2.488041 |
| C | -4.190773 | 1.747470  | -0.864646 |
| C | -0.274940 | 0.126121  | 1.075784  |
| O | -0.307994 | -0.999765 | -2.017022 |
| H | -0.337205 | -1.913735 | -2.313505 |
| H | -5.711403 | -1.116588 | -0.412831 |
| H | -5.768770 | -2.711047 | 1.467506  |
| H | -3.800957 | -3.078378 | 2.870152  |
| H | -1.703585 | -1.844181 | 2.449591  |
| H | -1.662188 | 2.651922  | -1.617311 |
| H | 0.583017  | 2.727982  | -2.016832 |
| H | 2.807916  | 2.174706  | -1.294760 |
| H | 1.785600  | -2.567542 | -2.119001 |
| H | 4.128945  | -1.827645 | -1.746122 |
| H | -2.803953 | -0.879374 | -2.647012 |
| H | -4.438174 | -0.225589 | -2.726725 |
| H | -3.059567 | 0.784494  | -3.164241 |
| H | -4.135870 | 2.141671  | 0.145506  |
| H | -5.222013 | 1.482383  | -1.076586 |
| H | -3.896878 | 2.522687  | -1.566165 |
| H | -0.473494 | 0.012288  | 2.134624  |
| H | 0.372838  | -0.679035 | 0.742078  |
| H | 0.207215  | 1.076324  | 0.892653  |

**spiropyran SP(S)<sub>1</sub>**

|   |           |           |           |
|---|-----------|-----------|-----------|
| C | -2.413705 | -0.391638 | 0.765235  |
| C | -2.891976 | -0.683699 | -0.490209 |
| C | -3.924666 | -1.596339 | -0.601568 |
| C | -4.442027 | -2.176894 | 0.545695  |
| C | -3.937475 | -1.859859 | 1.798301  |
| C | -2.900211 | -0.951406 | 1.923886  |
| H | -4.321497 | -1.863804 | -1.568259 |
| H | -5.245400 | -2.890557 | 0.464422  |
| H | -4.348092 | -2.325640 | 2.678787  |
| H | -2.489389 | -0.705794 | 2.891097  |
| C | -2.188350 | 0.094768  | -1.570198 |
| H | -0.514375 | 0.215617  | 1.203025  |
| C | -0.875178 | 0.528628  | -0.860249 |
| C | -0.260898 | 1.814769  | -1.241539 |
| C | 1.064729  | 1.953148  | -1.275611 |
| H | -0.916639 | 2.633875  | -1.478887 |
| C | 1.343545  | -0.411907 | -0.855206 |
| C | 1.935811  | 0.837893  | -1.013503 |
| H | 1.507153  | 2.900407  | -1.543428 |
| C | 2.089340  | -1.566725 | -0.723062 |
| C | 3.322958  | 0.924343  | -0.981583 |
| C | 3.465211  | -1.472275 | -0.710859 |
| H | 1.590317  | -2.517390 | -0.638051 |
| C | 4.057117  | -0.226992 | -0.820762 |
| H | 3.829237  | 1.869384  | -1.089803 |
| H | 4.090527  | -2.343005 | -0.613356 |
| C | -1.671273 | 1.908601  | 1.249344  |
| H | -2.490355 | 2.318648  | 0.675386  |
| H | -0.805446 | 2.555169  | 1.186699  |
| H | -1.983850 | 1.791404  | 2.280273  |
| O | -0.013077 | -0.553902 | -0.881932 |
| N | -1.323665 | 0.574814  | 0.702192  |
| C | -1.871564 | -0.747971 | -2.800862 |
| H | -1.256476 | -0.185763 | -3.498531 |
| H | -1.360037 | -1.666158 | -2.542627 |
| H | -2.798603 | -0.999395 | -3.307827 |
| C | -3.041757 | 1.284453  | -2.011822 |
| H | -2.554558 | 1.837483  | -2.810025 |
| H | -3.984291 | 0.907494  | -2.396944 |
| H | -3.276214 | 1.970434  | -1.204154 |
| N | 5.522888  | -0.132231 | -0.766515 |
| O | 6.001581  | 0.975749  | -0.830707 |
| O | 6.139626  | -1.165738 | -0.656261 |

**spiropyran SP(S)<sub>2</sub>**

|   |           |           |           |
|---|-----------|-----------|-----------|
| C | -2.514470 | -0.254625 | 0.648823  |
| C | -3.204562 | -0.426811 | -0.533003 |
| C | -4.332089 | -1.222850 | -0.533542 |
| C | -4.728689 | -1.821110 | 0.653213  |
| C | -4.014863 | -1.628833 | 1.825361  |
| C | -2.877106 | -0.834530 | 1.840177  |
| H | -4.894702 | -1.382334 | -1.439300 |
| H | -5.608617 | -2.442884 | 0.666270  |
| H | -4.346755 | -2.098202 | 2.736773  |
| H | -2.318755 | -0.682718 | 2.749539  |
| C | -2.533370 | 0.297982  | -1.669079 |
| H | -0.569803 | 0.056973  | 0.113690  |
| C | -1.782475 | 1.418881  | -0.902071 |
| C | -2.631755 | 2.565404  | -0.507325 |
| C | -2.154149 | 3.807503  | -0.526683 |
| H | -3.645004 | 2.345160  | -0.214408 |
| C | -0.044968 | 2.999154  | -1.402074 |
| C | -0.791732 | 4.070111  | -0.920568 |
| H | -2.781071 | 4.641156  | -0.249240 |
| C | 1.264455  | 3.143976  | -1.811695 |
| C | -0.189517 | 5.320050  | -0.844142 |
| C | 1.859733  | 4.384532  | -1.711550 |
| H | 1.802476  | 2.294553  | -2.198388 |
| C | 1.125015  | 5.450569  | -1.228574 |
| H | -0.728415 | 6.181434  | -0.484529 |
| H | 2.882269  | 4.545247  | -2.006983 |
| C | -0.930814 | 1.461152  | 1.552182  |
| H | -1.790060 | 1.992772  | 1.938767  |
| H | -0.185262 | 2.162023  | 1.195306  |
| H | -0.500503 | 0.831928  | 2.321585  |
| O | -0.600339 | 1.753318  | -1.524415 |
| N | -1.364775 | 0.617267  | 0.421917  |
| C | -1.541414 | -0.645264 | -2.353362 |
| H | -0.977192 | -0.123154 | -3.118804 |
| H | -0.837445 | -1.097364 | -1.656299 |
| H | -2.096014 | -1.454642 | -2.817561 |
| C | -3.493721 | 0.860060  | -2.701782 |
| H | -2.955448 | 1.453361  | -3.435745 |
| H | -3.978311 | 0.041943  | -3.227960 |
| H | -4.266143 | 1.477198  | -2.255045 |
| N | 1.782060  | 6.760701  | -1.114733 |
| O | 1.113230  | 7.684176  | -0.715030 |
| O | 2.948416  | 6.817029  | -1.426687 |

spiropyran SP(R)<sub>1</sub>

|   |           |           |           |
|---|-----------|-----------|-----------|
| C | -2.363879 | 0.048697  | 1.915181  |
| C | -2.586722 | 1.205060  | 1.203593  |
| C | -3.880082 | 1.520616  | 0.841124  |
| C | -4.905797 | 0.667154  | 1.216939  |
| C | -4.648883 | -0.489600 | 1.936944  |
| C | -3.352967 | -0.823132 | 2.300829  |
| H | -4.093515 | 2.415843  | 0.279341  |
| H | -5.919413 | 0.908954  | 0.940833  |
| H | -5.461130 | -1.137912 | 2.220174  |
| H | -3.147439 | -1.723637 | 2.855686  |
| C | -1.314006 | 1.984484  | 1.014483  |
| C | -0.241659 | 0.869655  | 1.178153  |
| C | 1.084612  | 1.260103  | 1.707643  |
| C | 2.196300  | 1.066897  | 1.002635  |
| H | 1.108484  | 1.736339  | 2.675012  |
| C | 0.904273  | 0.060678  | -0.781744 |
| C | 2.141555  | 0.495339  | -0.318053 |
| H | 3.152719  | 1.374746  | 1.396808  |
| C | 0.735526  | -0.431738 | -2.059297 |
| C | 3.243861  | 0.390647  | -1.153913 |
| C | 1.830934  | -0.495308 | -2.897010 |
| H | -0.239984 | -0.747623 | -2.390115 |
| C | 3.067273  | -0.096940 | -2.427339 |
| H | 4.225453  | 0.696803  | -0.831437 |
| H | 1.741905  | -0.852025 | -3.908931 |
| O | -0.201653 | 0.104521  | 0.017407  |
| N | -0.933250 | -0.074697 | 2.221576  |
| C | -1.177518 | 2.646904  | -0.345771 |
| H | -0.180539 | 3.063056  | -0.473448 |
| H | -1.371260 | 1.947657  | -1.150605 |
| H | -1.885209 | 3.466359  | -0.426971 |
| C | -1.211995 | 3.027135  | 2.128049  |
| H | -0.282104 | 3.584987  | 2.062240  |
| H | -2.034694 | 3.728445  | 2.034087  |
| H | -1.288694 | 2.583551  | 3.120771  |
| N | 4.232278  | -0.188308 | -3.315472 |
| O | 5.312732  | 0.066045  | -2.834489 |
| O | 4.026030  | -0.512749 | -4.461041 |
| C | -0.382331 | -1.447240 | 2.267833  |
| H | -0.625498 | -1.945064 | 1.340315  |
| H | -0.825795 | -1.970707 | 3.105063  |
| H | 0.692077  | -1.383075 | 2.399774  |
| H | -0.755996 | 0.364082  | 3.124142  |

spiropyran SP(R)<sub>2</sub>

|   |           |           |           |
|---|-----------|-----------|-----------|
| C | -2.235360 | 0.249785  | 2.208569  |
| C | -2.870102 | 1.195132  | 1.437719  |
| C | -4.166652 | 0.944988  | 1.021958  |
| C | -4.775890 | -0.242646 | 1.389320  |
| C | -4.112137 | -1.172841 | 2.176720  |
| C | -2.815709 | -0.936946 | 2.598211  |
| H | -4.696400 | 1.662299  | 0.415229  |
| H | -5.781149 | -0.450654 | 1.060381  |
| H | -4.606033 | -2.086466 | 2.463561  |
| H | -2.289341 | -1.656798 | 3.205365  |
| C | -1.996843 | 2.374483  | 1.118258  |
| C | -0.848596 | 2.245020  | 2.159073  |
| C | -1.064704 | 2.925503  | 3.459148  |
| C | -0.029787 | 3.415530  | 4.139525  |
| H | -2.071207 | 2.969654  | 3.839484  |
| C | 1.441392  | 2.939701  | 2.277377  |
| C | 1.301656  | 3.376935  | 3.589683  |
| H | -0.177838 | 3.883064  | 5.100699  |
| C | 2.652215  | 2.964208  | 1.616024  |
| C | 2.436587  | 3.804880  | 4.266832  |
| C | 3.772605  | 3.393492  | 2.296196  |
| H | 2.706448  | 2.649284  | 0.587076  |
| C | 3.645509  | 3.792821  | 3.613965  |
| H | 2.385542  | 4.153496  | 5.285281  |
| H | 4.740849  | 3.427379  | 1.827040  |
| O | 0.355829  | 2.516911  | 1.564206  |
| N | -0.875127 | 0.654925  | 2.537179  |
| C | -1.465894 | 2.274492  | -0.314320 |
| H | -0.814477 | 3.111458  | -0.541030 |
| H | -0.916302 | 1.356962  | -0.499594 |
| H | -2.309760 | 2.302993  | -0.996979 |
| C | -2.721658 | 3.708696  | 1.261316  |
| H | -2.025732 | 4.534124  | 1.137873  |
| H | -3.471498 | 3.791798  | 0.479872  |
| H | -3.227979 | 3.815740  | 2.214086  |
| N | 4.850540  | 4.217963  | 4.339133  |
| O | 4.702724  | 4.609612  | 5.473594  |
| O | 5.900820  | 4.134585  | 3.747965  |
| C | 0.174555  | -0.172626 | 1.897733  |
| H | 0.076413  | -0.094242 | 0.824321  |
| H | 0.029561  | -1.199982 | 2.211034  |
| H | 1.148199  | 0.177538  | 2.217114  |
| H | -0.734736 | 0.623851  | 3.544093  |

**TS for rotation from TTT to TTC**

|   |           |           |           |
|---|-----------|-----------|-----------|
| C | -0.055157 | 0.150366  | 0.081610  |
| C | 1.433629  | 0.023227  | -0.060421 |
| C | 1.994997  | 1.282717  | -0.097009 |
| N | 0.943905  | 2.229951  | -0.046137 |
| C | -0.230472 | 1.650986  | 0.016827  |
| C | 2.244086  | -1.088239 | -0.102329 |
| C | 3.615587  | -0.895708 | -0.181858 |
| C | 4.160840  | 0.380506  | -0.211657 |
| C | 3.354337  | 1.507174  | -0.168579 |
| C | -1.463360 | 2.376867  | -0.041977 |
| C | -2.658438 | 1.806646  | 0.145346  |
| C | -3.960554 | 2.468170  | -0.036486 |
| C | -4.612692 | 2.392238  | -1.254488 |
| C | -5.892953 | 2.890258  | -1.371165 |
| C | -6.543633 | 3.472196  | -0.303512 |
| C | -5.891617 | 3.566503  | 0.906275  |
| C | -4.608273 | 3.060328  | 1.049975  |
| O | -3.931586 | 3.096229  | 2.214866  |
| N | -6.592896 | 2.765500  | -2.651271 |
| O | -5.979409 | 2.285384  | -3.578795 |
| C | 1.228605  | 3.652069  | -0.062127 |
| C | -0.795930 | -0.572842 | -1.046198 |
| C | -0.442192 | -0.359875 | 1.483873  |
| O | -7.740071 | 3.144423  | -2.692660 |
| H | -4.471622 | 3.486846  | 2.906577  |
| H | 1.830925  | -2.084057 | -0.077204 |
| H | 4.270676  | -1.750354 | -0.224146 |
| H | 5.230078  | 0.498777  | -0.273873 |
| H | 3.780989  | 2.496206  | -0.198522 |
| H | -1.424651 | 3.421987  | -0.306693 |
| H | -2.706863 | 0.771000  | 0.445857  |
| H | -4.150456 | 1.931740  | -2.111633 |
| H | -6.384006 | 4.020601  | 1.753028  |
| H | -7.545878 | 3.842710  | -0.433753 |
| H | -0.546690 | -0.142687 | -2.011857 |
| H | -0.496355 | -1.616012 | -1.057099 |
| H | -1.871643 | -0.533284 | -0.920405 |
| H | 0.124180  | 0.162733  | 2.248745  |
| H | -0.195477 | -1.415482 | 1.546350  |
| H | -1.498371 | -0.236886 | 1.692649  |
| H | 1.517021  | 3.958958  | -1.062810 |
| H | 0.368240  | 4.213023  | 0.270759  |
| H | 2.051146  | 3.841644  | 0.618064  |

**TS for rotation from TTT to CTT**

|   |           |           |           |
|---|-----------|-----------|-----------|
| N | -0.000706 | -0.013220 | -0.125690 |
| C | 1.295972  | 0.024367  | -0.079333 |
| C | 2.128340  | 1.211718  | -0.124307 |
| C | 2.487563  | 1.822358  | -1.254440 |
| C | 3.436946  | 2.923353  | -1.299634 |
| C | 3.538567  | 3.836742  | -0.264037 |
| C | 4.484561  | 4.831587  | -0.322268 |
| C | 5.350482  | 4.958935  | -1.391794 |
| C | 5.247716  | 4.068778  | -2.437407 |
| C | 4.298547  | 3.055134  | -2.396496 |
| H | 2.601290  | 1.476085  | 0.813284  |
| H | 2.111810  | 1.460912  | -2.201996 |
| H | 6.079315  | 5.751276  | -1.395693 |
| C | -0.886301 | -4.024499 | 0.148007  |
| C | -1.969406 | -3.158956 | 0.073609  |
| C | -1.786267 | -1.788371 | -0.018628 |
| C | -0.480811 | -1.349556 | -0.029666 |
| C | 0.613053  | -2.188970 | 0.065172  |
| C | 0.417245  | -3.549289 | 0.149595  |
| C | 1.862011  | -1.361352 | 0.040751  |
| O | 4.176596  | 2.135016  | -3.368988 |
| N | 4.557928  | 5.783085  | 0.781415  |
| O | 3.632143  | 5.789519  | 1.563446  |
| C | -0.902215 | 1.119747  | -0.222223 |
| C | 2.689674  | -1.480470 | 1.325281  |
| C | 2.717836  | -1.638738 | -1.202911 |
| O | 5.536317  | 6.490174  | 0.835841  |
| H | 4.792066  | 2.310710  | -4.084959 |
| H | 1.249263  | -4.232160 | 0.217094  |
| H | -1.064378 | -5.085669 | 0.211682  |
| H | -2.970069 | -3.558503 | 0.085698  |
| H | -2.626163 | -1.115997 | -0.080251 |
| H | 2.874697  | 3.798287  | 0.583358  |
| H | 5.906625  | 4.155944  | -3.287884 |
| H | 2.098686  | -1.225976 | 2.200419  |
| H | 3.037344  | -2.503172 | 1.433818  |
| H | 3.557712  | -0.829674 | 1.278542  |
| H | 2.143347  | -1.488348 | -2.113032 |
| H | 3.056619  | -2.669864 | -1.180228 |
| H | 3.584127  | -0.985652 | -1.222543 |
| H | -1.505822 | 1.017772  | -1.117846 |
| H | -1.551833 | 1.122519  | 0.646986  |
| H | -0.324591 | 2.032435  | -0.264645 |

**TS for rotation from TTC to CTC**

|   |           |           |           |
|---|-----------|-----------|-----------|
| N | -0.094893 | -0.005099 | -0.163099 |
| C | 1.192388  | 0.064355  | -0.017838 |
| C | 1.973363  | 1.292491  | -0.042540 |
| C | 2.372079  | 1.921422  | 1.066510  |
| C | 3.231694  | 3.081021  | 1.209319  |
| C | 3.938849  | 3.697019  | 0.162271  |
| C | 4.800407  | 4.754966  | 0.413838  |
| C | 4.965463  | 5.235887  | 1.692227  |
| C | 4.253329  | 4.647447  | 2.718904  |
| C | 3.405391  | 3.590824  | 2.494026  |
| C | -0.536642 | -1.356679 | -0.229980 |
| C | 0.574470  | -2.171838 | -0.119637 |
| C | 1.787371  | -1.311384 | 0.067280  |
| C | 0.418479  | -3.539516 | -0.165630 |
| C | -0.863388 | -4.046792 | -0.327089 |
| C | -1.964273 | -3.206938 | -0.426184 |
| C | -1.821720 | -1.828551 | -0.378557 |
| O | 3.766796  | 3.227528  | -1.088110 |
| N | 4.405521  | 5.170461  | 4.078042  |
| O | 3.689763  | 4.707614  | 4.937143  |
| C | -1.007290 | 1.118851  | -0.260385 |
| C | 2.409726  | -1.507534 | 1.458987  |
| C | 2.835951  | -1.473894 | -1.035422 |
| O | 5.235270  | 6.033421  | 4.244970  |
| H | 4.327601  | 3.710483  | -1.701404 |
| H | 1.263611  | -4.203858 | -0.078658 |
| H | -1.009204 | -5.113800 | -0.375229 |
| H | -2.946561 | -3.633257 | -0.546235 |
| H | -2.674510 | -1.175206 | -0.462607 |
| H | 2.277077  | 1.623036  | -1.024404 |
| H | 2.023600  | 1.528463  | 2.013744  |
| H | 2.878473  | 3.158232  | 3.329060  |
| H | 5.342342  | 5.202975  | -0.405967 |
| H | 5.627405  | 6.056585  | 1.907379  |
| H | 1.674206  | -1.354597 | 2.243959  |
| H | 2.781213  | -2.524584 | 1.538243  |
| H | 3.240893  | -0.825582 | 1.607184  |
| H | 2.406323  | -1.283966 | -2.014987 |
| H | 3.219417  | -2.489499 | -1.020219 |
| H | 3.663138  | -0.789898 | -0.871318 |
| H | -1.416711 | 1.164500  | -1.264933 |
| H | -1.815966 | 0.973192  | 0.446797  |
| H | -0.470159 | 2.028401  | -0.029425 |

**TS for rotation from CTT to CTC**

|   |           |           |           |
|---|-----------|-----------|-----------|
| N | -0.098699 | 0.028464  | -0.055415 |
| C | 1.190781  | 0.115855  | 0.109891  |
| C | 2.001863  | 1.298427  | 0.179212  |
| C | 1.918362  | 2.354931  | -0.626646 |
| C | 2.933712  | 3.423383  | -0.619287 |
| C | 4.050908  | 3.310499  | -1.452262 |
| C | 5.003600  | 4.317811  | -1.493833 |
| C | 4.878138  | 5.419808  | -0.677554 |
| C | 3.794119  | 5.497877  | 0.173162  |
| C | 2.814614  | 4.527760  | 0.202785  |
| C | -0.511819 | -1.332674 | -0.112511 |
| C | 0.612767  | -2.128058 | 0.008047  |
| C | 1.814206  | -1.248357 | 0.163127  |
| C | 0.485828  | -3.498530 | -0.022210 |
| C | -0.786219 | -4.034550 | -0.164540 |
| C | -1.903369 | -3.216870 | -0.265505 |
| C | -1.787972 | -1.835206 | -0.244012 |
| O | 4.161617  | 2.176932  | -2.177571 |
| N | 3.689213  | 6.631058  | 1.089944  |
| O | 2.660691  | 6.743571  | 1.718983  |
| C | -1.047461 | 1.121767  | -0.146119 |
| C | 2.538985  | -1.470808 | 1.494442  |
| C | 2.772354  | -1.360822 | -1.032528 |
| O | 4.644033  | 7.366827  | 1.163075  |
| H | 4.926362  | 2.224838  | -2.756565 |
| H | 1.346328  | -4.142591 | 0.067182  |
| H | -0.911759 | -5.104655 | -0.193586 |
| H | -2.878851 | -3.663488 | -0.365713 |
| H | -2.656720 | -1.204481 | -0.332297 |
| H | 2.857578  | 1.214603  | 0.832014  |
| H | 1.135042  | 2.413283  | -1.371472 |
| H | 1.979929  | 4.645799  | 0.873053  |
| H | 5.850851  | 4.227512  | -2.156492 |
| H | 5.609473  | 6.209537  | -0.681669 |
| H | 1.867063  | -1.330719 | 2.335684  |
| H | 2.918994  | -2.486814 | 1.528147  |
| H | 3.382398  | -0.794673 | 1.596541  |
| H | 2.253059  | -1.148846 | -1.962735 |
| H | 3.170495  | -2.369133 | -1.080696 |
| H | 3.596113  | -0.660883 | -0.929955 |
| H | -1.927111 | 0.859588  | 0.430037  |
| H | -0.600336 | 2.021437  | 0.254629  |
| H | -1.333954 | 1.280672  | -1.181418 |

**TS for rotation from CCT to CCC**

|   |           |           |           |
|---|-----------|-----------|-----------|
| C | 0.120005  | 0.295143  | -0.212525 |
| C | 1.599070  | 0.397879  | 0.006903  |
| C | 1.901297  | 1.682680  | 0.413047  |
| N | 0.685090  | 2.412939  | 0.507999  |
| C | -0.327387 | 1.690819  | 0.137414  |
| C | 2.612835  | -0.524131 | -0.126662 |
| C | 3.911140  | -0.114485 | 0.145918  |
| C | 4.191759  | 1.189682  | 0.528516  |
| C | 3.179701  | 2.124941  | 0.670956  |
| C | -1.719863 | 2.112254  | 0.081555  |
| C | -2.230796 | 2.928342  | -0.836844 |
| C | -1.452511 | 3.615880  | -1.882461 |
| C | -0.701870 | 4.739209  | -1.609834 |
| C | 0.056128  | 5.325687  | -2.601758 |
| C | 0.036862  | 4.858081  | -3.898895 |
| C | -0.757669 | 3.769895  | -4.196091 |
| C | -1.492931 | 3.143984  | -3.198535 |
| O | -2.261466 | 2.063693  | -3.419995 |
| N | 0.915546  | 6.447786  | -2.238430 |
| O | 0.985182  | 6.730961  | -1.056752 |
| C | 0.661639  | 3.749122  | 1.075115  |
| C | -0.230172 | -0.035518 | -1.667504 |
| C | -0.540008 | -0.706929 | 0.744429  |
| O | 1.516333  | 7.007245  | -3.121653 |
| H | -2.292992 | 1.849028  | -4.356153 |
| H | 2.412328  | -1.537002 | -0.438942 |
| H | 4.719915  | -0.820507 | 0.052347  |
| H | 5.210293  | 1.483609  | 0.721190  |
| H | 3.395106  | 3.137862  | 0.968749  |
| H | -2.386477 | 1.583153  | 0.749473  |
| H | -3.305552 | 3.051258  | -0.855459 |
| H | -0.716800 | 5.194249  | -0.638100 |
| H | -0.799846 | 3.390756  | -5.206132 |
| H | 0.633305  | 5.344241  | -4.652405 |
| H | 0.219328  | 0.678961  | -2.351213 |
| H | 0.154714  | -1.022685 | -1.904957 |
| H | -1.305221 | -0.033372 | -1.815430 |
| H | -0.334077 | -0.461835 | 1.782289  |
| H | -0.138395 | -1.695021 | 0.543352  |
| H | -1.614340 | -0.738239 | 0.587412  |
| H | 1.188149  | 3.720451  | 2.023360  |
| H | 1.161012  | 4.445498  | 0.409693  |
| H | -0.363862 | 4.052585  | 1.230756  |

**TS for rotation from TCC to TCT**

|   |           |           |           |
|---|-----------|-----------|-----------|
| C | -0.044684 | -0.398018 | -0.045665 |
| C | 1.220293  | 0.148620  | -0.127354 |
| C | 1.456770  | 1.595464  | -0.096400 |
| C | 1.518743  | 2.456253  | 0.931561  |
| C | 1.468490  | 2.279836  | 2.358086  |
| C | 1.066817  | 1.115360  | 3.239744  |
| C | -0.459616 | 0.924161  | 3.138194  |
| N | 1.793450  | 3.304882  | 3.119561  |
| C | 1.715941  | 2.993505  | 4.495564  |
| C | 1.347723  | 1.669128  | 4.606780  |
| C | 1.219977  | 1.097391  | 5.852402  |
| C | 1.450218  | 1.891128  | 6.965385  |
| C | 1.790182  | 3.230315  | 6.833233  |
| C | 1.932114  | 3.811945  | 5.585418  |
| C | -0.187996 | -1.770692 | -0.041069 |
| C | 0.892675  | -2.620241 | -0.161770 |
| C | 2.152029  | -2.077917 | -0.309976 |
| C | 2.316443  | -0.701131 | -0.301729 |
| O | 3.515318  | -0.101147 | -0.408036 |
| N | -1.527384 | -2.330740 | 0.140317  |
| O | -2.439642 | -1.545405 | 0.275544  |
| C | 2.218525  | 4.620898  | 2.662328  |
| C | 1.799006  | -0.206629 | 2.994725  |
| O | -1.628041 | -3.534526 | 0.161064  |
| H | 4.207777  | -0.745711 | -0.576483 |
| H | 0.936374  | 0.063008  | 5.968743  |
| H | 1.357736  | 1.462525  | 7.949849  |
| H | 1.953697  | 3.827159  | 7.714987  |
| H | 2.201060  | 4.850901  | 5.498116  |
| H | 1.716327  | 3.474132  | 0.636709  |
| H | 1.658228  | 2.041813  | -1.062997 |
| H | -0.922817 | 0.221429  | 0.014716  |
| H | 3.012062  | -2.721023 | -0.421564 |
| H | 0.733856  | -3.684922 | -0.145446 |
| H | 2.849819  | -0.055354 | 2.768132  |
| H | 1.732366  | -0.796404 | 3.903679  |
| H | 1.339508  | -0.778826 | 2.199969  |
| H | -0.989173 | 1.838308  | 3.388926  |
| H | -0.751657 | 0.159932  | 3.851667  |
| H | -0.749406 | 0.596576  | 2.148430  |
| H | 1.382945  | 5.156386  | 2.223816  |
| H | 2.594508  | 5.172079  | 3.511004  |
| H | 3.016716  | 4.525135  | 1.936364  |

**TS for rotation from TTT to TCT**

|   |           |           |           |
|---|-----------|-----------|-----------|
| C | 0.015311  | 0.059150  | 0.104532  |
| C | 1.504223  | 0.016017  | -0.093971 |
| C | 2.007422  | 1.315149  | -0.053725 |
| N | 0.950980  | 2.202086  | 0.074543  |
| C | -0.247563 | 1.549603  | 0.023238  |
| C | 2.361900  | -1.048413 | -0.223984 |
| C | 3.725486  | -0.797293 | -0.304102 |
| C | 4.214379  | 0.503313  | -0.258775 |
| C | 3.363755  | 1.585991  | -0.138559 |
| C | -1.429654 | 2.189617  | -0.136064 |
| C | -2.729473 | 1.559044  | -0.246063 |
| C | -3.563933 | 1.268593  | 0.821659  |
| C | -3.237091 | 1.636049  | 2.147536  |
| C | -4.132944 | 1.432724  | 3.147760  |
| C | -5.392851 | 0.885810  | 2.910385  |
| C | -5.731136 | 0.486076  | 1.636370  |
| C | -4.828639 | 0.640077  | 0.597699  |
| O | -5.072765 | 0.232769  | -0.641886 |
| N | -3.775316 | 1.838392  | 4.512329  |
| O | -2.639155 | 2.211228  | 4.695579  |
| C | 1.077422  | 3.632254  | 0.161081  |
| C | -0.755610 | -0.751440 | -0.923372 |
| C | -0.297042 | -0.399975 | 1.541302  |
| O | -4.642592 | 1.768350  | 5.348576  |
| H | -5.955114 | -0.142121 | -0.725360 |
| H | 1.991264  | -2.060753 | -0.261371 |
| H | 4.414511  | -1.619498 | -0.405189 |
| H | 5.276637  | 0.671702  | -0.326635 |
| H | 3.751055  | 2.590989  | -0.118762 |
| H | -2.291996 | 2.104347  | 2.361371  |
| H | -6.694821 | 0.038748  | 1.446988  |
| H | -6.081136 | 0.782920  | 3.732428  |
| H | -0.576509 | -0.383715 | -1.929491 |
| H | -0.452829 | -1.793872 | -0.882232 |
| H | -1.824275 | -0.716215 | -0.721380 |
| H | 0.260549  | 0.190977  | 2.262129  |
| H | -0.010077 | -1.440822 | 1.661420  |
| H | -1.357062 | -0.300683 | 1.755854  |
| H | 2.081589  | 3.888931  | 0.471202  |
| H | 0.866158  | 4.097483  | -0.800494 |
| H | 0.384736  | 4.015913  | 0.901985  |
| H | -3.081887 | 1.273939  | -1.229982 |
| H | -1.426841 | 3.271449  | -0.205579 |

**TS for rotation from TTC to TCC**

|   |           |           |           |
|---|-----------|-----------|-----------|
| C | 0.096228  | -0.060127 | 0.092235  |
| C | 1.588469  | 0.006758  | -0.077650 |
| C | 2.003446  | 1.335230  | -0.005174 |
| N | 0.890268  | 2.142492  | 0.144947  |
| C | -0.261755 | 1.414058  | 0.087668  |
| C | 2.519097  | -0.992851 | -0.219417 |
| C | 3.862210  | -0.644881 | -0.284648 |
| C | 4.261054  | 0.685822  | -0.214970 |
| C | 3.337482  | 1.703344  | -0.078107 |
| C | -1.477487 | 1.995594  | -0.043540 |
| C | -2.759079 | 1.326587  | -0.099546 |
| C | -3.607710 | 0.997071  | 0.952877  |
| C | -4.888197 | 0.471632  | 0.646169  |
| C | -5.815652 | 0.310633  | 1.626789  |
| C | -5.553072 | 0.636200  | 2.954261  |
| C | -4.309062 | 1.117167  | 3.292215  |
| C | -3.333482 | 1.284463  | 2.323804  |
| O | -2.115176 | 1.737902  | 2.624823  |
| N | -7.147954 | -0.192511 | 1.271965  |
| O | -7.335341 | -0.482632 | 0.114908  |
| C | 0.922821  | 3.573856  | 0.288334  |
| C | -0.591594 | -0.840506 | -1.019721 |
| C | -0.215951 | -0.665856 | 1.472300  |
| O | -7.955244 | -0.273283 | 2.166088  |
| H | -2.066462 | 1.971104  | 3.557521  |
| H | 2.219717  | -2.027601 | -0.278351 |
| H | 4.607577  | -1.415071 | -0.394722 |
| H | 5.308992  | 0.929414  | -0.275038 |
| H | 3.653344  | 2.732538  | -0.036506 |
| H | -5.147751 | 0.230375  | -0.371654 |
| H | -4.086096 | 1.364939  | 4.319137  |
| H | -6.326337 | 0.499793  | 3.691228  |
| H | -0.416581 | -0.383893 | -1.989210 |
| H | -0.213647 | -1.858289 | -1.049208 |
| H | -1.663868 | -0.893904 | -0.843763 |
| H | 0.232358  | -0.073415 | 2.263839  |
| H | 0.195167  | -1.669964 | 1.521588  |
| H | -1.286718 | -0.724141 | 1.639286  |
| H | 1.912187  | 3.884505  | 0.595914  |
| H | 0.667498  | 4.060358  | -0.651553 |
| H | 0.214183  | 3.879678  | 1.050039  |
| H | -3.127537 | 1.061705  | -1.084761 |
| H | -1.520698 | 3.078201  | -0.090812 |



**TS for rotation from CCT to CTT**

|   |           |           |           |
|---|-----------|-----------|-----------|
| C | -0.048505 | -0.134272 | 0.129045  |
| C | 1.443445  | -0.016508 | 0.011096  |
| C | 1.791533  | 1.326275  | -0.117140 |
| N | 0.635928  | 2.093133  | -0.145341 |
| C | -0.478515 | 1.305492  | -0.089731 |
| C | 2.424153  | -0.977316 | 0.042323  |
| C | 3.749225  | -0.576649 | -0.077530 |
| C | 4.081982  | 0.767415  | -0.206303 |
| C | 3.107954  | 1.747092  | -0.224368 |
| C | -1.763539 | 1.715279  | -0.196139 |
| C | -2.257676 | 3.073253  | -0.373293 |
| C | -2.466808 | 3.664734  | -1.613564 |
| C | -2.311419 | 2.942096  | -2.820157 |
| C | -2.489970 | 3.569000  | -4.016874 |
| C | -2.843278 | 4.912587  | -4.098882 |
| C | -3.005439 | 5.643473  | -2.942305 |
| C | -2.818836 | 5.047737  | -1.707082 |
| O | -2.923301 | 5.716675  | -0.560693 |
| N | -2.304791 | 2.811725  | -5.262458 |
| O | -1.977791 | 1.651189  | -5.162926 |
| C | 0.638116  | 3.521467  | -0.287966 |
| C | -0.650123 | -1.079107 | -0.905930 |
| C | -0.416488 | -0.573271 | 1.554869  |
| O | -2.481319 | 3.411384  | -6.296072 |
| H | -3.209778 | 6.623442  | -0.704730 |
| H | 2.176739  | -2.022366 | 0.144721  |
| H | 4.532258  | -1.316981 | -0.077874 |
| H | 5.116968  | 1.051593  | -0.302871 |
| H | 3.375115  | 2.784411  | -0.338377 |
| H | -2.066863 | 1.893382  | -2.796350 |
| H | -3.275786 | 6.687056  | -2.996936 |
| H | -2.987967 | 5.358373  | -5.068432 |
| H | -0.412782 | -0.760862 | -1.916791 |
| H | -0.251970 | -2.079247 | -0.762387 |
| H | -1.730376 | -1.135681 | -0.799695 |
| H | 0.018988  | 0.094564  | 2.292213  |
| H | -0.034765 | -1.574205 | 1.735573  |
| H | -1.495235 | -0.583659 | 1.686721  |
| H | 1.581687  | 3.914937  | 0.068987  |
| H | 0.484807  | 3.821186  | -1.323164 |
| H | -0.163452 | 3.943015  | 0.312158  |
| H | -2.460137 | 3.672365  | 0.505344  |
| H | -2.510076 | 0.931265  | -0.122080 |

**TS for rotation from CTC to CCC**

|   |           |           |           |
|---|-----------|-----------|-----------|
| C | 0.046422  | 0.055195  | -0.116362 |
| C | 1.541850  | -0.029923 | -0.013750 |
| C | 2.071063  | 1.259357  | 0.025800  |
| N | 1.024151  | 2.170826  | 0.047914  |
| C | -0.177140 | 1.531822  | 0.142278  |
| C | 2.379801  | -1.117365 | 0.012255  |
| C | 3.750181  | -0.897935 | 0.072127  |
| C | 4.266210  | 0.393123  | 0.098356  |
| C | 3.436710  | 1.498531  | 0.072392  |
| C | -1.372062 | 2.076329  | 0.478351  |
| C | -1.708621 | 3.415529  | 0.919256  |
| C | -2.066748 | 4.537942  | 0.174609  |
| C | -2.358629 | 5.737473  | 0.867825  |
| C | -2.792314 | 6.837845  | 0.194872  |
| C | -2.973330 | 6.829059  | -1.185355 |
| C | -2.695373 | 5.677931  | -1.890536 |
| C | -2.228569 | 4.547274  | -1.241108 |
| O | -1.919800 | 3.423252  | -1.897587 |
| N | -3.086590 | 8.061976  | 0.954938  |
| O | -2.853046 | 8.041052  | 2.141161  |
| C | 1.169570  | 3.598784  | -0.017727 |
| C | -0.374802 | -0.222455 | -1.573179 |
| C | -0.683022 | -0.861000 | 0.852606  |
| O | -3.537716 | 8.997944  | 0.339592  |
| H | -2.166319 | 3.491115  | -2.825439 |
| H | 1.989040  | -2.122166 | -0.010490 |
| H | 4.424797  | -1.737699 | 0.103596  |
| H | 5.333272  | 0.534488  | 0.152482  |
| H | 3.847158  | 2.493916  | 0.111291  |
| H | -2.254883 | 5.780458  | 1.939542  |
| H | -2.832039 | 5.657800  | -2.961546 |
| H | -3.328847 | 7.717807  | -1.679104 |
| H | 0.163573  | 0.427338  | -2.257664 |
| H | -0.148532 | -1.252986 | -1.831662 |
| H | -1.440885 | -0.050977 | -1.695833 |
| H | -0.432678 | -0.624842 | 1.882330  |
| H | -0.406846 | -1.894124 | 0.662402  |
| H | -1.759472 | -0.783133 | 0.726574  |
| H | 2.189821  | 3.850217  | -0.274718 |
| H | 0.506608  | 3.998280  | -0.778260 |
| H | 0.914129  | 4.050473  | 0.940022  |
| H | -1.636653 | 3.583543  | 1.988592  |
| H | -2.207645 | 1.384644  | 0.445982  |

| TS for inversion between SP(S) <sub>1</sub> and SP(S) <sub>2</sub> |           |           | TS for inversion between SP(R) <sub>1</sub> and SP(R) <sub>2</sub> |   |           |           |           |
|--------------------------------------------------------------------|-----------|-----------|--------------------------------------------------------------------|---|-----------|-----------|-----------|
| N                                                                  | 0.132303  | -0.248294 | -0.249278                                                          | N | 0.074796  | -0.043595 | -0.182807 |
| C                                                                  | 1.550135  | -0.040615 | 0.029111                                                           | C | 1.509254  | 0.033629  | 0.063281  |
| C                                                                  | 1.860780  | 1.294801  | 0.060407                                                           | C | 1.961817  | 1.326406  | 0.006355  |
| C                                                                  | 0.704372  | 2.187518  | -0.273071                                                          | C | 0.908004  | 2.330753  | -0.351349 |
| C                                                                  | -0.500014 | 1.196308  | -0.500052                                                          | C | -0.408329 | 1.491506  | -0.522406 |
| C                                                                  | 3.166740  | 1.664910  | 0.332039                                                           | C | 3.301950  | 1.573692  | 0.248413  |
| C                                                                  | 4.115897  | 0.682163  | 0.545170                                                           | C | 4.145327  | 0.514822  | 0.527638  |
| C                                                                  | 3.772795  | -0.662157 | 0.496571                                                           | C | 3.662669  | -0.786231 | 0.564986  |
| C                                                                  | 2.469320  | -1.045996 | 0.239759                                                           | C | 2.324998  | -1.045343 | 0.333858  |
| O                                                                  | -1.419716 | 1.260862  | 0.550065                                                           | O | -1.307966 | 1.844635  | 0.452726  |
| C                                                                  | -2.735043 | 1.590688  | 0.382135                                                           | C | -2.661899 | 1.806196  | 0.275295  |
| C                                                                  | -3.268116 | 1.764698  | -0.889115                                                          | C | -3.209277 | 1.676444  | -0.995798 |
| C                                                                  | -2.393995 | 1.567095  | -2.013662                                                          | C | -2.293615 | 1.515049  | -2.094472 |
| C                                                                  | -1.109192 | 1.273419  | -1.844453                                                          | C | -0.981094 | 1.432666  | -1.886415 |
| C                                                                  | -4.604119 | 2.113893  | -1.009405                                                          | C | -4.590153 | 1.734302  | -1.132917 |
| C                                                                  | -5.358140 | 2.271111  | 0.129191                                                           | C | -5.363215 | 1.890006  | -0.006305 |
| C                                                                  | -4.830888 | 2.083688  | 1.393655                                                           | C | -4.816378 | 1.983317  | 1.259746  |
| C                                                                  | -3.499512 | 1.739143  | 1.522580                                                           | C | -3.444371 | 1.952888  | 1.402567  |
| C                                                                  | 0.392603  | 3.153274  | 0.864353                                                           | C | 0.753468  | 3.365671  | 0.760016  |
| C                                                                  | 1.033284  | 2.987405  | -1.534725                                                          | C | 1.293961  | 3.039199  | -1.651185 |
| N                                                                  | -6.768328 | 2.653452  | -0.016148                                                          | N | -6.821860 | 1.986687  | -0.154321 |
| O                                                                  | -7.408308 | 2.807645  | 0.996907                                                           | O | -7.473894 | 2.084619  | 0.858365  |
| C                                                                  | -0.142598 | -1.281138 | -1.274744                                                          | C | -0.686458 | -0.680760 | 0.918305  |
| O                                                                  | -7.182178 | 2.786197  | -1.145331                                                          | O | -7.258188 | 1.970062  | -1.280688 |
| H                                                                  | 3.445429  | 2.706985  | 0.364227                                                           | H | 3.685541  | 2.581773  | 0.215694  |
| H                                                                  | 5.136334  | 0.963014  | 0.749050                                                           | H | 5.189534  | 0.699255  | 0.721357  |
| H                                                                  | 4.525499  | -1.414972 | 0.661255                                                           | H | 4.331582  | -1.602999 | 0.779622  |
| H                                                                  | 2.199016  | -2.089113 | 0.209034                                                           | H | 1.947587  | -2.054980 | 0.365748  |
| H                                                                  | -0.341124 | -0.528431 | 0.608908                                                           | H | -0.292546 | 1.316253  | -2.705523 |
| H                                                                  | -0.451799 | 1.155958  | -2.687676                                                          | H | -2.688651 | 1.469732  | -3.097475 |
| H                                                                  | -2.799156 | 1.677793  | -3.007498                                                          | H | -2.980081 | 2.056603  | 2.368935  |
| H                                                                  | -3.052033 | 1.594471  | 2.491660                                                           | H | -5.061315 | 1.666627  | -2.099555 |
| H                                                                  | -5.057968 | 2.268084  | -1.974070                                                          | H | -5.471072 | 2.093911  | 2.107081  |
| H                                                                  | -5.462291 | 2.219867  | 2.255039                                                           | H | -0.035636 | 4.074318  | 0.530042  |
| H                                                                  | 0.443899  | -1.060763 | -2.156689                                                          | H | 0.534825  | 2.901684  | 1.715323  |
| H                                                                  | -1.199533 | -1.279804 | -1.511408                                                          | H | 1.685039  | 3.915266  | 0.850992  |
| H                                                                  | 0.147647  | -2.242463 | -0.868800                                                          | H | 0.485825  | 3.667673  | -2.013517 |
| H                                                                  | -0.488952 | 3.747868  | 0.642389                                                           | H | 2.151695  | 3.676193  | -1.460009 |
| H                                                                  | 0.235862  | 2.635777  | 1.803739                                                           | H | 1.577805  | 2.338983  | -2.430885 |
| H                                                                  | 1.230892  | 3.832639  | 0.983161                                                           | H | -0.574367 | -0.077999 | 1.808213  |
| H                                                                  | 0.181348  | 3.572265  | -1.868306                                                          | H | -0.278703 | -1.670009 | 1.089442  |
| H                                                                  | 1.842095  | 3.674925  | -1.307687                                                          | H | -1.729121 | -0.751667 | 0.630564  |
| H                                                                  | 1.366854  | 2.351809  | -2.349458                                                          | H | -0.112701 | -0.568144 | -1.033965 |

## TS between SP(S) and merocyanine CCC

|   |           |           |           |
|---|-----------|-----------|-----------|
| H | -1.450140 | 4.728830  | -1.343208 |
| H | -5.408705 | 4.473206  | -2.868215 |
| H | -1.719685 | 2.484302  | -0.236966 |
| H | -6.808699 | 2.405801  | -2.365000 |
| H | -6.967005 | 0.148857  | -1.522675 |
| H | -2.466197 | -0.300283 | -1.850284 |
| H | -3.744187 | -0.211533 | -3.075975 |
| H | -2.920768 | -1.729264 | -2.764059 |
| H | -5.029151 | -2.993703 | -2.194854 |
| H | -5.880254 | -1.557481 | -2.756406 |
| H | -6.249114 | -2.259038 | -1.172514 |
| H | -6.574105 | -0.520654 | 2.351670  |
| H | -7.153399 | -1.075039 | 0.784216  |
| H | -7.093803 | 0.663840  | 1.146786  |
| H | -4.514144 | -1.341657 | 3.260662  |
| H | -2.940681 | -3.240906 | 3.459302  |
| H | -1.946811 | -4.248632 | 1.459477  |
| H | -2.480608 | -3.379575 | -0.784522 |
| H | -4.337645 | 0.942508  | 0.747361  |
| C | -4.379128 | -1.345265 | 1.114704  |
| C | -3.813863 | -1.881987 | -0.022965 |
| C | -3.718625 | 2.288245  | -0.950654 |
| C | -2.631116 | -3.423399 | 1.352978  |
| C | -3.199807 | -2.857829 | 2.485353  |
| C | -4.087588 | -1.799307 | 2.381840  |
| C | -2.929654 | -2.936387 | 0.090152  |
| C | -6.601070 | -0.289679 | 1.293883  |
| C | -5.454181 | -2.044915 | -1.883535 |
| C | -4.985955 | 0.054133  | -0.630544 |
| C | -4.348533 | -1.193577 | -1.254093 |
| C | -3.303662 | -0.827649 | -2.295082 |
| C | -6.078219 | 0.734530  | -1.354541 |
| C | -5.981074 | 1.975608  | -1.823183 |
| C | -4.782687 | 2.777948  | -1.690073 |
| C | -2.515297 | 2.931730  | -0.809479 |
| C | -2.365762 | 4.167867  | -1.416625 |
| C | -3.428093 | 4.688379  | -2.126021 |
| C | -4.622154 | 4.020104  | -2.287784 |
| N | -5.221750 | -0.219764 | 0.803566  |
| N | -3.283588 | 6.023184  | -2.734496 |
| O | -3.893238 | 1.071123  | -0.278313 |
| O | -4.250866 | 6.474767  | -3.300845 |
| O | -2.212382 | 6.564291  | -2.609412 |
